# Supplementary material for: Expression of Phosphofructokinase in Skeletal Muscle Is Influenced by Genetic Variation and Associated With Insulin Sensitivity
Source: PubMed Central journal article supplement — Diabetes. 2014 Feb 13;63(3):1154–65. doi: 10.2337/db13-1301 (PMC3931395; doi:10.2337/db13-1301), 2014-02-13
Supplement: supp_db13-1301_DB131301SupplementaryData.pdf [file supp_db13-1301_DB131301SupplementaryData.pdf]

## SUPPLEMENTARY DATA

### Genotyping

Genotyping of the Malmö Men and Malmö Training Intervention studies was done simultaneously at Lund University on HumanOmniExpress 12v1 C chips (Illumina, California, USA) and genotype calling was done with the Illumina Genome studio software. A total of 103403 and 81424 SNPs from the Malmö Men and Malmö Training Intervention studies failed to pass the QC. Details on exclusion criteria and a more detailed decomposition of reasons for failure are available in the supplement. Genotyping of the MuTHER samples was completed as part of the larger TwinsUK dataset (N~6000) and was done with a combination of Illumina arrays (HumanHap300, HumanHap610Q, 1M-Duo and 1.2MDuo 1M). Intensity data for each of the three arrays were pooled separately (with 1M-Duo and 1.2MDuo 1M pooled together), and genotypes were called with the Illuminus26 calling algorithm.

### Genotyping quality control

The following exclusion criteria were applied to samples from all three cohorts:

(i) sample call rate <98%; (ii) evidence of non-European ancestry as assessed by principal component analysis or multidimensionality scaling comparisons with HapMap populations; (iii) genome-wide heterozygosity outliers detected on a plot of missingness vs. heterozygosity at genome-wide level. In the Malmö cohorts, we also checked for (iv) gender mismatches using standard settings in PLINK; (v) relatedness between individuals using the IBD-test as implemented in PLINK, excluding individuals from pairs with  $\pi_{\text{hat}} \geq 0.2$  or outliers based upon average  $\pi_{\text{hat}}$ . In the MuTHER dataset, the (v) IBD-test was used to identify samples suggestive of sample identity errors. Exclusion criteria for SNPs were: (i) SNP call rate < 98% (Malmö) or SNP call rate < 97% (SNPs with  $\text{MAF} \geq 5\%$ ) or SNP call rate <99% (SNPs with  $1\% \leq \text{MAF} < 5\%$ ) (MuTHER); (ii) Hardy-Weinberg equilibrium test performed in a set of unrelated samples, p-values <  $5.7 \times 10^{-7}$  (SNPs with  $\text{MAF} \geq 5\%$ ) or p-values < 0.0001 (SNPs with  $1\% \leq \text{MAF} < 5\%$ ) (Malmö) or Hardy-Weinberg equilibrium test p-values <  $5.7 \times 10^{-7}$  (MuTHER); (iii)  $\text{MAF} < 1\%$  assessed in a set of unrelated samples.

### Imputation

In each study, we imputed individual genotypes to 1000 Genomes data, to provide a common set of SNPs for analysis. Imputation was carried out using IMPUTE2 ([https://mathgen.stats.ox.ac.uk/impute/impute\\_v2](https://mathgen.stats.ox.ac.uk/impute/impute_v2)) and the June 2011 release of the 1000 Genomes Phase I panel was used as a reference panel ([http://mathgen.stats.ox.ac.uk/impute/data\\_download\\_1000G\\_phase1\\_interim](http://mathgen.stats.ox.ac.uk/impute/data_download_1000G_phase1_interim)). The MuTHER samples were imputed as part of the TwinsUK dataset (N~6000) and pre-phasing of this data was carried out using IMPUTE2. The two Malmö cohorts were pre-phased using SHAPEIT (<http://www.shapeit.fr>). For all analyses, probabilistic genotypes were used for the subsequent analyses. After imputation, SNPs were filtered using a minor allele frequency ( $\text{MAF}$ ) > 5% and an IMPUTE2 info value of >0.8.

### Gene expression

Due to differences in gene expression arrays used across studies, we adopted a gene-centric approach to our analyses, selecting probes in each study that mapped to the 7006 genes common to all three. All probes were mapped to NCBI build 37 of the Genome Browser and only uniquely mapping probes, with no mismatches and either an Ensembl or RefSeq ID, were kept for analysis. Probes encompassing a common SNP ( $\text{MAF} > 5\%$ ) were excluded from all studies. Expression profiling of the MuTHER samples was performed using the Illumina Human HT-12 V3 BeadChips (Illumina Inc.), including more than 48000 probes. 200ng of total RNA was processed according to the protocol supplied by Illumina. All samples were randomized before array hybridization, and technical replicates were always hybridized on different BeadChips. Log<sub>2</sub>-transformed expression signals were normalized with quantile normalization of the replicates of each individual, followed by quantile normalization across all

## SUPPLEMENTARY DATA

individuals. Post-quality-control expression profiles were obtained for 42 individuals. The Illumina probe annotations were mapped to build 37 using the R package (`illuminaHumanv3.db`). After applying the probe inclusion criteria above, 9633 probes were left in the analysis. Gene expression analysis in the Malmo Men cohort was assayed using the Affymetrix HG-U133a platform, while the Affymetrix custom array NUGOhs1a520180 was used for the Malmo Intervention cohort (Affymetrix Inc.). All probes were mapped to NCBI build 37 and annotated with R packages `hgu133a.db` and `nugohs1a520180.db`. Log<sub>2</sub>-transformed expression signals of both Malmo cohorts were normalized using RMA (Robust Multichip Average) expression measure (16).

### **Annotation and enrichment analysis**

The program SnpEff (1) was used to annotate and predict the effects of both our eQTL SNPs and all *cis* SNPs tested in our study. We assessed the enrichment of low p-values closer to TSSs using the Exact Binomial Test implemented in the R statistical environment. Specifically, we performed an exact test of a null hypothesis about the probability of success in a Bernoulli experiment, in which the number of successes corresponds to the number of eQTL SNPs where the associated gene is the closest. We only tested eQTL SNPs where the eQTL gene and the nearest gene were probed by our meta-analysis (within 250kb of TSS). The Test of Equal or Given Proportions, implemented in R, was used to test the null hypothesis that the proportions (probabilities of success) are the same, or that they are equal certain given values. Specifically, this test was performed to test eQTL SNP enrichment for each gene functional unit and for functional RegulomeDB categories in comparison with the background of all *cis* SNPs tested.

### **Gene expression analysis of publicly available data sets**

Raw expression data for ten public microarray studies were retrieved from ArrayExpress (<http://www.ebi.ac.uk/arrayexpress/>), all based on the Affymetrix HG-U133+2 array platform (Table S5). Data normalization was carried out with Robust Probabilistic Averaging (RPA) (2) with probesets mapped to Ensembl gene identifiers using the R/Bioconductor package `customCDF` v.1.2.1 (3), and quality controlled using the `arrayQualityMetrics` v3.14.0 (4). None of the selected samples failed quality control. Differential expression between subjects with type 2 diabetes (T2D) and normoglycemic (NGT) individuals was estimated by meta-analysis of three datasets with full annotation for these groups: E-GEOD-18732, E-GEOD-19420, and E-GEOD-25462, including 102 T2D and 87 NGT samples. The datasets were individually normalized with RPA and meta-analysed using the `geneMeta` R/Bioconductor package [<http://www.bioconductor.org/packages/release/bioc/html/GeneMeta.html>]. Association to BMI was calculated by retrieving all samples within the seven selected datasets, with annotation for BMI (Table S3), from the HG-U133+2 arrays and normalized as a single dataset using RPA, followed by a linear regression for BMI adjusted for sex.

### **Integration of genome-wide association data from MAGIC and DIAGRAM**

To investigate whether our significant eQTL are enriched for associations to T2D and glycaemic traits, we did a lookup of our significant eQTLs SNPs in GWAS data from the DIAGRAM consortium for T2D (5), and from the MAGIC consortium for HOMA-IR (6), 2 hour glucose, 2 hour glucose adjusted for BMI, fasting insulin, fasting insulin adjusted for BMI, fasting glucose and fasting glucose adjusted for BMI (7). We did a binomial sign test to quantify the extent of the enrichment in each of the GWAS studies, using only independent eQTL SNPs, by calculating the probability of observing the number of GWAS SNPs we found with a p-value < 0.05 amongst our eQTL SNPs. We also noted any eQTL SNP that was associated with any of the DIAGRAM and MAGIC phenotypes with genome-wide significance.

SUPPLEMENTARY DATA

**Supplementary Table 1.** Top SNP per gene for all significant (FDR<5%, p-value=1.96E-05) eQTLs identified in the meta-analysis. Information on bimodality of gene expression, distance of eQTL SNPs to transcription start sites (TSS), functional annotation of eQTL SNPs and previously reported eQTLs are also detailed.

| SNP (dbSNP137) | Gene     | Allele1 | Allele2 | Weight | Zscore  | Pvalue   | Direction | Het_I <sup>2</sup> | Het_ChiSq | Het_Df | Het_Pval  | FDR      | Bimodal gene expression | SNP within which gene | gene in our gene list | SNP_pos - TSS | SNP relative transcript location | Regulo meDB score | eQTL seen before |
|----------------|----------|---------|---------|--------|---------|----------|-----------|--------------------|-----------|--------|-----------|----------|-------------------------|-----------------------|-----------------------|---------------|----------------------------------|-------------------|------------------|
| rs2238479      | CRYM     | a       | g       | 95,5   | -11,309 | 1,18E-29 | ---       | 52                 | 8,337     | 2      | 0,01548   | 2,46E-22 |                         | CRYM                  | yes                   | 13 134        | intron                           | 6                 |                  |
| rs2296805      | PEX6     | t       | g       | 95,5   | 9,065   | 1,24E-19 | +++       | 86,3               | 29,248    | 2      | 4,46E-07  | 2,90E-13 |                         | GNMT                  | -                     | -2 852        | intron                           | 1f                | yes              |
| rs7810193      | SEC61G   | t       | c       | 95,5   | -8,896  | 5,78E-19 | ---       | 74,3               | 15,569    | 2      | 0,0004162 | 4,15E-13 |                         | -                     | -                     | -68 068       | intergenic                       | 6                 |                  |
| rs251851       | ERAP2    | a       | t       | 95,5   | 8,434   | 3,35E-17 | +++       | 74,8               | 15,875    | 2      | 0,0003571 | 6,65E-12 |                         | LNPEP                 | yes                   | 113 375       | intron                           | 6                 | yes              |
| rs138616686    | NQO2     | a       | g       | 95,5   | -8,233  | 1,83E-16 | ---       | -67,6              | 2,387     | 2      | 0,3032    | 2,90E-11 |                         | NQO2                  | yes                   | 3 904         | intron                           |                   | yes              |
| rs12483950     | DDT      | c       | g       | 95,5   | 8,09    | 5,96E-16 | +++       | 77,5               | 17,814    | 2      | 0,0001354 | 9,39E-11 |                         | -                     | -                     | -17 378       | downstream                       | 5                 | yes              |
| rs10073049     | PFDN1    | a       | c       | 95,5   | -8,089  | 6,03E-16 | ---       | 34,4               | 6,099     | 2      | 0,04739   | 9,44E-11 |                         | CYSTM1                | -                     | -18 515       | intron                           | 6                 |                  |
| rs80317390     | NUDT2    | a       | g       | 95,5   | 7,988   | 1,37E-15 | +++       | 0                  | 1,049     | 2      | 0,5918    | 1,25E-10 |                         | -                     | -                     | 49 182        | downstream, upstream             | 5                 | yes              |
| rs58655904     | LDHC     | t       | c       | 95,5   | 7,792   | 6,60E-15 | +++       | 68,5               | 12,691    | 2      | 0,001755  | 3,97E-10 | yes                     | -                     | -                     | -1 662        | downstream, upstream             | 4                 |                  |
| rs1955657      | SERPINA5 | a       | g       | 95,5   | 7,718   | 1,19E-14 | +++       | 0                  | 0,642     | 2      | 0,7252    | 6,69E-10 |                         | SERPINA3              | -                     | 24 918        | intron                           | 6                 |                  |
| rs7503161      | EIF5A    | a       | c       | 95,5   | -7,418  | 1,19E-13 | ---       | 70                 | 13,347    | 2      | 0,001264  | 5,62E-09 |                         | -                     | -                     | -2 353        | upstream                         |                   | yes              |
| rs2278022      | ATMIN    | t       | c       | 95,5   | 7,357   | 1,89E-13 | +++       | 55                 | 8,895     | 2      | 0,01171   | 8,74E-09 |                         | ATMIN                 | yes                   | 6 035         | missense                         |                   |                  |
| rs2409494      | TMEM50B  | t       | c       | 95,5   | -6,828  | 8,61E-12 | ---       | 71,9               | 14,23     | 2      | 0,000813  | 2,57E-07 |                         | IFNGR2, TMEM50B       | yes                   | 3 616         | intron                           |                   | yes              |
| rs3863496      | TIMM22   | t       | c       | 95,5   | 6,756   | 1,42E-11 | +++       | 70,4               | 13,527    | 2      | 0,001155  | 4,02E-07 | yes                     | TIMM22                | yes                   | 2 807         | intron                           |                   | yes              |
| rs2268177      | CDC42    | a       | t       | 95,5   | 6,624   | 3,49E-11 | ++        | 93,4               | 60,627    | 2      | 6,84E-14  | 9,17E-07 |                         | CDC42                 | yes                   | 36 291        | intron                           | 5                 | yes              |
| rs9859086      | LRRFIP2  | a       | c       | 95,5   | 6,593   | 4,30E-11 | +++       | 0                  | 0,548     | 2      | 0,7605    | 1,11E-06 |                         | LRRFIP2               | yes                   | 52 075        | intron                           |                   | yes              |
| rs4374997      | PIWIL2   | a       | c       | 95,5   | 6,544   | 6,00E-11 | +++       | 0                  | 0,469     | 2      | 0,7909    | 1,44E-06 | yes                     | PIWIL2                | yes                   | 36 517        | intron                           | 5                 | yes              |
| rs1055138      | FAM149A  | c       | g       | 95,5   | 6,488   | 8,69E-11 | +++       | 28,8               | 5,62      | 2      | 0,06021   | 2,05E-06 |                         | CYP4V2                | -                     | 47 405        | missense                         | 4                 |                  |
| rs8076632      | SPATA20  | c       | g       | 95,5   | -6,475  | 9,46E-11 | ---       | 18,1               | 4,885     | 2      | 0,08696   | 2,22E-06 |                         | SPATA20               | yes                   | 1 500         | missense                         | 1f                | yes              |
| rs7008207      | EPHX2    | a       | c       | 95,5   | 6,356   | 2,07E-10 | +++       | -52,9              | 2,616     | 2      | 0,2704    | 4,50E-06 |                         | EPHX2                 | yes                   | 42 547        | intron                           | 6                 |                  |
| rs11089856     | H1FO     | a       | c       | 95,5   | -6,26   | 3,85E-10 | ---       | 42,4               | 6,939     | 2      | 0,03114   | 8,11E-06 |                         | GCAT                  | -                     | 4 671         | intron                           | 5                 |                  |
| rs178092       | SNAP29   | a       | c       | 95,5   | 6,25    | 4,11E-10 | +++       | 37,7               | 6,419     | 2      | 0,04038   | 8,51E-06 |                         | -                     | -                     | 45 001        | intergenic                       |                   | yes              |
| rs403908       | CARKD    | a       | g       | 95,5   | -6,101  | 1,05E-09 | ---       | 12                 | 4,547     | 2      | 0,103     | 1,88E-05 |                         | CARKD                 | yes                   | 17 752        | intron                           | 5                 | yes              |
| rs10872251     | FABP7    | a       | g       | 95,5   | 6,097   | 1,08E-09 | ++        | 87,3               | 31,5      | 2      | 1,45E-07  | 1,91E-05 | yes                     | FABP7                 | yes                   | 3 449         | intron                           | 6                 |                  |
| rs10861347     | KIAA1033 | t       | c       | 95,5   | 6,091   | 1,12E-09 | +++       | 78                 | 18,148    | 2      | 0,0001146 | 1,98E-05 |                         | ALDH1L2               | -                     | -24 081       | intron                           | 3a                |                  |

SUPPLEMENTARY DATA

|             |          |   |   |      |        |          |     |       |        |   |           |            |                             |       |          |                         |        |     |     |
|-------------|----------|---|---|------|--------|----------|-----|-------|--------|---|-----------|------------|-----------------------------|-------|----------|-------------------------|--------|-----|-----|
| rs2491020   | KIAA1279 | a | g | 95,5 | -6,085 | 1,17E-09 | --- | 37,2  | 6,368  | 2 | 0,04143   | 2,05E-05   | -                           | -     | 30 090   | downstream              | 4      | yes |     |
| rs1131017   | RPS26    | c | g | 95,5 | -5,999 | 1,98E-09 | --- | 80,2  | 20,194 | 2 | 4,12E-05  | 3,28E-05   | RPS26                       | yes   | 244      | 5'UTR                   | 4      | yes |     |
| rs4443587   | KLHDC10  | t | g | 95,5 | 5,95   | 2,67E-09 | +++ | 78,2  | 18,332 | 2 | 0,0001045 | 4,34E-05   | -                           | -     | 68 170   | downstream              | 6      |     |     |
| rs1271970   | RPP40    | a | g | 95,5 | -5,886 | 3,95E-09 | --- | 42,9  | 7,004  | 2 | 0,03014   | 6,22E-05   | RPP40                       | yes   | -207     | downstream              | 6      | yes |     |
| rs34270592  | AMFR     | a | c | 95,5 | 5,884  | 3,99E-09 | +++ | 42,9  | 7,009  | 2 | 0,03006   | 6,27E-05   | AMFR                        | yes   | 36 315   | intron                  | 6      |     |     |
| rs17137288  | TYW1     | a | g | 95,5 | -5,849 | 4,94E-09 | --- | 46,2  | 7,437  | 2 | 0,02427   | 7,65E-05   | TYW1                        | yes   | 120 179  | intron                  | 6      | yes |     |
| rs11779069  | LY96     | t | c | 95,5 | -5,804 | 6,49E-09 | --- | 44    | 7,14   | 2 | 0,02815   | 9,88E-05   | UBE2W                       | yes   | -134 803 | intron                  | 6      |     |     |
| rs8070763   | STAT3    | t | c | 95,5 | -5,784 | 7,29E-09 | --- | 67,9  | 12,467 | 2 | 0,001963  | 0,00010992 | STAT3                       | yes   | 71 054   | intron                  |        |     |     |
| rs12433361  | ARG2     | a | t | 95,5 | 5,761  | 8,38E-09 | +++ | 32,4  | 5,92   | 2 | 0,05182   | 0,00012319 | ARG2                        | yes   | 8 488    | intron                  |        | yes |     |
| rs141761164 | PSMG1    | t | c | 95,5 | -5,732 | 9,90E-09 | --- | 0     | 1,483  | 2 | 0,4764    | 0,00014325 | -                           | -     | -18 253  | intergenic              |        |     |     |
| rs7646106   | ARL8B    | t | c | 95,5 | 5,694  | 1,24E-08 | +++ | 0     | 0,088  | 2 | 0,9572    | 0,00016938 | EDEM1                       | yes   | 94 042   | 3'UTR                   |        |     |     |
| rs3762815   | PDCD6IP  | a | g | 95,5 | 5,646  | 1,64E-08 | +++ | 70    | 13,34  | 2 | 0,001269  | 0,00021789 | PDCD6IP                     | yes   | 23 658   | intron                  | 5      |     |     |
| rs17354693  | HYDIN    | a | g | 95,5 | 5,595  | 2,21E-08 | +++ | 28,8  | 5,621  | 2 | 0,06019   | 0,0002602  | MARVELD3                    | -     | 822 416  | intron                  | 5      | yes |     |
| rs7487568   | CHD4     | t | c | 95,5 | 5,593  | 2,24E-08 | +++ | 0     | 1,781  | 2 | 0,4105    | 0,00026276 | ANO2                        | -     | -686 186 | intron                  |        |     |     |
| rs3816864   | LPPR2    | t | g | 95,5 | -5,582 | 2,37E-08 | --- | -12,9 | 3,542  | 2 | 0,1702    | 0,00027352 | RAB3D                       | -     | -19 541  | intron                  | 5      | yes |     |
| rs6537035   | ZNF330   | a | g | 95,5 | 5,581  | 2,39E-08 | +++ | 51,6  | 8,262  | 2 | 0,01607   | 0,00027491 | RNF150                      | -     | -20 349  | intergenic              |        |     |     |
| rs11131799  | AGA      | a | g | 95,5 | -5,56  | 2,69E-08 | --- | -8,7  | 3,678  | 2 | 0,1589    | 0,00028666 | yes                         | AGA   | yes      | 11 450                  | intron | 4   | yes |
| rs113671109 | MKRN2    | t | c | 95,5 | 5,553  | 2,81E-08 | +++ | 0     | 1,01   | 2 | 0,6034    | 0,00029275 | yes                         | MKRN2 | yes      | 22 292                  | intron | 6   | yes |
| rs10902201  | TMEM80   | a | g | 95,5 | -5,527 | 3,25E-08 | --- | 0     | 0,803  | 2 | 0,6693    | 0,0003311  | DEAF1,<br>EPS8L2,<br>TMEM80 | yes   | 8 968    | downstream,<br>upstream | 5      |     |     |
| rs118129429 | PCDH8    | a | g | 95,5 | -5,526 | 3,29E-08 | --- | 0     | 1,128  | 2 | 0,5688    | 0,0003311  | LECT1                       | yes   | -136 623 | intron                  | 6      |     |     |
| rs11237443  | GAB2     | a | c | 95,5 | -5,519 | 3,41E-08 | --- | 0     | 1,832  | 2 | 0,4       | 0,00034023 | GAB2                        | yes   | 78 754   | intron                  |        | yes |     |
| rs4737751   | ARMC1    | a | g | 95,5 | 5,515  | 3,49E-08 | +++ | 57    | 9,298  | 2 | 0,009572  | 0,00034776 | MTFR1                       | yes   | 85 543   | intron                  |        |     |     |
| rs10816774  | CTNNA1   | a | g | 95,5 | -5,475 | 4,36E-08 | --- | 40,2  | 6,688  | 2 | 0,0353    | 0,00042674 | EPB41L4B                    | yes   | 232 151  | intron                  | 5      |     |     |
| rs4747339   | CACNB2   | t | c | 95,5 | -5,453 | 4,95E-08 | --- | -15,2 | 3,473  | 2 | 0,1761    | 0,00045885 | CACNB2                      | yes   | 161 818  | intron                  |        |     |     |
| rs35962983  | NR1D2    | t | c | 95,5 | -5,399 | 6,70E-08 | --- | 0     | 1,292  | 2 | 0,524     | 0,00059798 | NR1D2                       | yes   | 24 432   | intron                  |        |     |     |
| rs6781329   | HRG      | a | g | 95,5 | -5,386 | 7,20E-08 | --- | 0     | 1,443  | 2 | 0,486     | 0,0006349  | -                           | -     | -203 576 | intergenic              | 6      |     |     |
| rs9428015   | CCBL2    | a | g | 95,5 | -5,353 | 8,65E-08 | --- | 0     | 1,046  | 2 | 0,5928    | 0,00074335 | PKN2                        | -     | -132 115 | intron                  | 5      | yes |     |
| rs114624166 | PRR16    | t | g | 95,5 | -5,316 | 1,06E-07 | --- | 41,2  | 6,799  | 2 | 0,03339   | 0,00086608 | -                           | -     | -35 365  | intergenic              | 6      | yes |     |

SUPPLEMENTARY DATA

|             |          |   |   |      |        |          |     |       |        |   |           |            |                     |         |          |            |            |     |
|-------------|----------|---|---|------|--------|----------|-----|-------|--------|---|-----------|------------|---------------------|---------|----------|------------|------------|-----|
| rs2433611   | GATM     | a | c | 95,5 | -5,274 | 1,34E-07 | --- | 0     | 0,583  | 2 | 0,747     | 0,00102064 | GATM                | yes     | 12 332   | intron     |            |     |
| rs62092421  | TCF4     | t | g | 95,5 | 5,243  | 1,58E-07 | +++ | 54,6  | 8,809  | 2 | 0,01222   | 0,00113307 | -                   | -       | -23 468  | intergenic | 5          |     |
| rs11668620  | TMEM161A | c | g | 95,5 | -5,242 | 1,59E-07 | --- | -98,2 | 2,018  | 2 | 0,3646    | 0,00114013 | SLC25A42            | yes     | -11 939  | intron     | 5          | yes |
| rs12048758  | CNIH4    | a | g | 95,5 | 5,235  | 1,65E-07 | +++ | 0     | 0,137  | 2 | 0,934     | 0,00117581 | WDR26               | yes     | 34 454   | intron     |            |     |
| rs111584059 | DOPEY2   | a | g | 95,5 | 5,229  | 1,70E-07 | +++ | -59,3 | 2,51   | 2 | 0,285     | 0,00120534 | DOPEY2              | yes     | 25 465   | intron     | 6          | yes |
| rs150478765 | WDR41    | a | g | 95,5 | 5,217  | 1,82E-07 | +++ | 29,3  | 5,659  | 2 | 0,05906   | 0,00126536 | WDR41               | yes     | 70 691   | intron     |            |     |
| rs62580498  | CDK5RAP2 | a | g | 95,5 | 5,192  | 2,08E-07 | +++ | 56,7  | 9,237  | 2 | 0,00987   | 0,00141436 | CDK5RAP2            | yes     | 8 349    | intron     | 5          | yes |
| rs6689008   | NUCKS1   | t | c | 95,5 | -5,188 | 2,13E-07 | --- | 0     | 1,969  | 2 | 0,3735    | 0,00144529 | yes                 | SLC45A3 | -        | -32 773    | intron     | 4   |
| rs9819419   | FYCO1    | a | g | 95,5 | -5,182 | 2,20E-07 | --- | 41,3  | 6,811  | 2 | 0,03319   | 0,00147624 | -                   | -       | 177 969  | intergenic | 5          |     |
| rs7289655   | GSTT1    | a | c | 95,5 | -5,168 | 2,37E-07 | --- | 82,2  | 22,445 | 2 | 1,34E-05  | 0,00158174 | -                   | -       | -40 910  | intergenic | 5          | yes |
| rs9296398   | PRPH2    | t | c | 95,5 | 5,144  | 2,69E-07 | +++ | -29,2 | 3,095  | 2 | 0,2128    | 0,00177154 | PRPH2               | yes     | 9 346    | intron     |            | yes |
| rs6572656   | ATP5S    | a | c | 95,5 | 5,116  | 3,13E-07 | +++ | 19,8  | 4,987  | 2 | 0,08263   | 0,00201754 | L2HGDH              | -       | -3 727   | intron     | 1b         | yes |
| rs246771    | KCNIP1   | c | g | 95,5 | -5,113 | 3,18E-07 | --- | 16,4  | 4,783  | 2 | 0,09148   | 0,00204533 | DOCK2               | yes     | -658 847 | intron     | 6          |     |
| rs2490273   | ZNF593   | t | g | 95,5 | 5,112  | 3,19E-07 | ++  | 78,3  | 18,405 | 2 | 0,0001008 | 0,00204985 | -                   | -       | -6 629   | downstream | 5          |     |
| rs3120065   | OSGEP    | t | c | 95,5 | -5,09  | 3,58E-07 | --- | 19,5  | 4,971  | 2 | 0,08329   | 0,00225477 | OSGEP               | yes     | 4 506    | intron     |            | yes |
| rs2359614   | EIF2B2   | a | t | 95,5 | -5,059 | 4,22E-07 | -+  | 66,1  | 11,786 | 2 | 0,002758  | 0,00253322 | TMED10              | -       | 160 173  | intron     | 5          | yes |
| rs7657455   | MFAP3L   | c | g | 95,5 | 5,048  | 4,46E-07 | +++ | 80,6  | 20,608 | 2 | 3,35E-05  | 0,00266691 | -                   | -       | 51 096   | intergenic | 5          | yes |
| rs17818245  | COX4I1   | a | g | 95,5 | 5,042  | 4,60E-07 | +++ | -0,1  | 3,995  | 2 | 0,1357    | 0,00272888 | yes                 | -       | -        | 241 929    | intergenic |     |
| rs59633892  | CDKAL1   | t | c | 95,5 | -5,016 | 5,28E-07 | --- | 60,3  | 10,068 | 2 | 0,006514  | 0,00309946 | -                   | -       | 698 658  | downstream |            | yes |
| rs10823398  | TSPAN15  | a | c | 95,5 | -5,003 | 5,64E-07 | --- | 0     | 0,028  | 2 | 0,9862    | 0,00329182 | -                   | -       | 59 138   | downstream |            |     |
| rs72940355  | FECH     | a | g | 95,5 | -4,984 | 6,22E-07 | --- | 30,9  | 5,793  | 2 | 0,05523   | 0,00358652 | FECH                | yes     | 20 685   | intron     | 6          |     |
| 17-44619118 | NSF      | a | g | 95,5 | 4,98   | 6,35E-07 | +++ | 0     | 0,575  | 2 | 0,7502    | 0,00364945 | LRRC37A2,<br>ARL17A | -       | -48 916  | intron     |            |     |
| rs35030877  | COG7     | a | g | 95,5 | -4,977 | 6,46E-07 | --- | -7,5  | 3,722  | 2 | 0,1555    | 0,00370233 | -                   | -       | -4 785   | downstream | 6          |     |
| rs75000818  | SGCB     | a | g | 95,5 | 4,973  | 6,59E-07 | +++ | 0     | 1,685  | 2 | 0,4306    | 0,00377028 | -                   | -       | 196 337  | intergenic |            |     |
| rs1899288   | CPNE3    | t | c | 95,5 | 4,967  | 6,82E-07 | +++ | 71,9  | 14,226 | 2 | 0,0008143 | 0,00388201 | CPNE3               | yes     | 38 671   | intron     |            |     |
| rs148654891 | FIBP     | a | g | 95,5 | -4,952 | 7,34E-07 | --- | -19,1 | 3,359  | 2 | 0,1865    | 0,00410278 | -                   | -       | -75 947  | intergenic |            |     |
| rs10200594  | WIPF1    | a | g | 95,5 | -4,95  | 7,43E-07 | --- | -72,9 | 2,313  | 2 | 0,3146    | 0,00410278 | -                   | -       | -12 812  | upstream   | 4          |     |
| rs8007801   | EML1     | c | g | 95,5 | 4,942  | 7,72E-07 | +++ | -10   | 3,638  | 2 | 0,1622    | 0,00422405 | -                   | -       | 393 986  | intergenic | 5          |     |

# SUPPLEMENTARY DATA

|             |          |   |   |      |        |          |     |       |        |   |          |            |            |         |          |            |        |     |  |
|-------------|----------|---|---|------|--------|----------|-----|-------|--------|---|----------|------------|------------|---------|----------|------------|--------|-----|--|
| rs78701930  | HMBX1    | t | c | 95,5 | 4,935  | 8,00E-07 | +++ | 57,3  | 9,358  | 2 | 0,009289 | 0,00436969 | KIF13B     | yes     | 215 862  | intron     |        |     |  |
| rs2520180   | C17orf48 | t | c | 95,5 | 4,931  | 8,17E-07 | +++ | -12,3 | 3,561  | 2 | 0,1685   | 0,00443719 | SCO1       | -       | -6 597   | intron     |        | yes |  |
| rs12086750  | PPIE     | c | g | 95,5 | 4,924  | 8,48E-07 | +++ | 70,5  | 13,546 | 2 | 0,001144 | 0,0045865  | PPIE       | yes     | 5 952    | intron     | 5      | yes |  |
| rs11204702  | ARNT     | a | c | 95,5 | 4,924  | 8,49E-07 | +++ | 80,3  | 20,316 | 2 | 3,88E-05 | 0,00459016 | GOLPH3L    | yes     | -118 673 | intron     |        |     |  |
| rs61752479  | AMPD1    | a | g | 95,5 | -4,922 | 8,57E-07 | --- | 64,8  | 11,369 | 2 | 0,003398 | 0,00460719 | AMPD1      | yes     | 15 535   | missense   |        |     |  |
| rs35044129  | PDLIM5   | a | t | 95,5 | 4,917  | 8,79E-07 | +++ | 27,8  | 5,538  | 2 | 0,06273  | 0,00469205 | PDLIM5     | yes     | 139 807  | intron     | 6      |     |  |
| rs73181350  | PCK1     | c | g | 95,5 | 4,913  | 8,97E-07 | ++  | 90,8  | 43,446 | 2 | 3,68E-10 | 0,00476031 | -          | -       | 512 190  | intergenic |        |     |  |
| 11-36166998 | TRAF6    | a | g | 95,5 | -4,905 | 9,34E-07 | --- | 60    | 10,009 | 2 | 0,006708 | 0,00493152 | LDLRAD3    | -       | -338 318 | intron     |        |     |  |
| rs13267051  | CCDC25   | a | g | 95,5 | 4,896  | 9,76E-07 | +++ | 0     | 1,28   | 2 | 0,5273   | 0,00511079 | CCDC25     | yes     | 22 484   | intron     | 5      |     |  |
| rs935074    | SPSB1    | a | g | 95,5 | 4,876  | 1,08E-06 | +++ | 0     | 0,071  | 2 | 0,9652   | 0,00558444 | CTNNBIP1   | yes     | 577 027  | intron     | 5      |     |  |
| rs2297811   | CYP4B1   | t | c | 95,5 | 4,876  | 1,08E-06 | +++ | 53,5  | 8,603  | 2 | 0,01355  | 0,00559199 | CYP4B1     | yes     | 15 120   | intron     | 6      | yes |  |
| rs56007403  | LGMN     | t | c | 95,5 | -4,872 | 1,11E-06 | --- | 0     | 0,469  | 2 | 0,791    | 0,00568303 | yes        | SLC24A4 | -        | -247 484   | intron | 5   |  |
| rs1218556   | LENEP    | t | g | 95,5 | -4,861 | 1,17E-06 | --- | -1    | 3,96   | 2 | 0,1381   | 0,00594316 | KCNN3      | yes     | -144 949 | intron     | 5      |     |  |
| rs72670883  | ZCCHC11  | t | c | 95,5 | -4,85  | 1,23E-06 | --- | 0     | 0,529  | 2 | 0,7675   | 0,006232   | SLC1A7     | -       | 709 213  | intron     |        |     |  |
| rs76611793  | CPVL     | t | c | 95,5 | -4,836 | 1,32E-06 | --- | -5,2  | 3,802  | 2 | 0,1494   | 0,00661326 | CPVL, CHN2 | yes     | 146 872  | intron     | 5      |     |  |
| rs2543519   | MPST     | a | g | 95,5 | -4,833 | 1,35E-06 | --- | 0     | 1,268  | 2 | 0,5305   | 0,00671862 | TMPRSS6    | yes     | 64 568   | intron     | 5      |     |  |
| rs147990233 | RPS16    | a | t | 95,5 | 4,823  | 1,41E-06 | +++ | 54,2  | 8,728  | 2 | 0,01273  | 0,00698077 | SUPT5H     | yes     | 28 629   | intron     |        | yes |  |
| rs11119673  | KCNH1    | a | t | 95,5 | -4,812 | 1,49E-06 | --- | -65,7 | 2,414  | 2 | 0,2992   | 0,00729092 | KCNH1      | yes     | 381 442  | intron     | 5      |     |  |
| rs686618    | PAMR1    | t | c | 95,5 | -4,811 | 1,50E-06 | --- | 0     | 1,812  | 2 | 0,4042   | 0,00730873 | -          | -       | 113 019  | intergenic |        |     |  |
| rs56019197  | TMEM110  | t | c | 95,5 | -4,81  | 1,51E-06 | --- | 0     | 0,264  | 2 | 0,8764   | 0,0073618  | TMEM110    | yes     | 3 982    | intron     |        |     |  |
| rs2032890   | ERAP1    | a | c | 95,5 | 4,797  | 1,61E-06 | +++ | 65,3  | 11,523 | 2 | 0,003146 | 0,00778284 | ERAP1      | yes     | 10 965   | intron     |        | yes |  |
| rs1033181   | MYCT1    | a | g | 95,5 | -4,791 | 1,66E-06 | --- | 0     | 1,768  | 2 | 0,4131   | 0,00795101 | ESR1       | yes     | -824 208 | intron     |        |     |  |
| rs2517145   | PDGFRL   | a | c | 95,5 | -4,769 | 1,85E-06 | --- | 0     | 0,94   | 2 | 0,6251   | 0,00875921 | PDGFRL     | yes     | 11 892   | intron     | 6      |     |  |
| rs11057389  | ABCB9    | t | c | 95,5 | -4,769 | 1,85E-06 | --- | 14,9  | 4,7    | 2 | 0,09537  | 0,00877216 | DNAH10     | -       | 968 605  | intron     |        |     |  |
| rs6739468   | CRIP1    | t | g | 95,5 | 4,761  | 1,93E-06 | +++ | 0     | 1,336  | 2 | 0,5127   | 0,00907339 | CRIP1      | yes     | 5 056    | intron     |        | yes |  |
| rs113265714 | ALAS1    | a | g | 95,5 | 4,752  | 2,02E-06 | +++ | 0     | 1,976  | 2 | 0,3724   | 0,00941876 | WDR82      | -       | 77 071   | intron     |        |     |  |
| rs7503584   | PNPO     | a | g | 95,5 | -4,751 | 2,03E-06 | --- | 0     | 1,26   | 2 | 0,5327   | 0,00945275 | CDK5RAP3   | -       | 36 148   | intron     | 1f     |     |  |
| rs2194762   | ABI2     | t | c | 95,5 | -4,743 | 2,11E-06 | --- | 44,3  | 7,181  | 2 | 0,02758  | 0,00980376 | -          | -       | 841 720  | intergenic |        | yes |  |

SUPPLEMENTARY DATA

|             |          |   |   |      |        |          |     |       |        |   |          |            |         |     |          |            |            |     |
|-------------|----------|---|---|------|--------|----------|-----|-------|--------|---|----------|------------|---------|-----|----------|------------|------------|-----|
| rs11169368  | CSRP2    | t | c | 95,5 | 4,74   | 2,14E-06 | +++ | -1,8  | 3,928  | 2 | 0,1403   | 0,00993279 | -       | -   | -755 947 | intergenic |            |     |
| rs2114308   | MMP20    | a | g | 95,5 | 4,731  | 2,23E-06 | +++ | 0     | 1,267  | 2 | 0,5307   | 0,01029151 | YAP1    | yes | -399 232 | intron     | 6          |     |
| rs8010851   | WARS     | t | c | 95,5 | 4,73   | 2,25E-06 | +++ | 18,9  | 4,931  | 2 | 0,08495  | 0,0103516  | WARS    | yes | 24 516   | intron     | 6          |     |
| rs6443851   | MCCC1    | a | g | 95,5 | 4,726  | 2,29E-06 | +++ | 17,1  | 4,823  | 2 | 0,08968  | 0,01051029 | MCCC1   | yes | 86 044   | upstream   | 6          |     |
| rs4268913   | TMBIM1   | a | g | 95,5 | -4,719 | 2,37E-06 | --- | 0     | 1,809  | 2 | 0,4047   | 0,01082444 | PNKD    | -   | 39 959   | intron     | 6          |     |
| rs35273276  | ZBTB16   | t | g | 95,5 | 4,718  | 2,39E-06 | +++ | 0     | 0,419  | 2 | 0,8109   | 0,01086709 | yes     | -   | -        | 936 909    | intergenic |     |
| rs10829610  | MGMT     | a | g | 95,5 | 4,716  | 2,40E-06 | +++ | -55,2 | 2,577  | 2 | 0,2756   | 0,01093736 | MGMT    | yes | 165 615  | intron     | 6          | yes |
| rs200680626 | B3GALNT1 | a | g | 95,5 | -4,713 | 2,44E-06 | --- | -63,5 | 2,447  | 2 | 0,2942   | 0,01109586 | yes     | -   | -        | 848 718    | intergenic |     |
| rs12510251  | ING2     | a | g | 95,5 | -4,693 | 2,70E-06 | --- | -48,6 | 2,691  | 2 | 0,2604   | 0,01191568 | ODZ3    | yes | -811 635 | intron     | 6          |     |
| rs11265398  | S100A9   | a | g | 95,5 | -4,69  | 2,73E-06 | --- | 89,1  | 36,632 | 2 | 1,11E-08 | 0,01203476 | UBAP2L  | yes | 905 328  | intron     | 5          |     |
| rs7534861   | MOSC1    | a | g | 95,5 | -4,689 | 2,75E-06 | --- | 0     | 1,138  | 2 | 0,566    | 0,01211015 | MARC1   | -   | 25 862   | intron     | 3a         |     |
| rs75701904  | KLHL2    | t | c | 95,5 | -4,687 | 2,77E-06 | --- | -19,5 | 3,346  | 2 | 0,1877   | 0,01218174 | -       | -   | 318 830  | intergenic |            |     |
| rs13275128  | MSRA     | c | g | 95,5 | -4,685 | 2,80E-06 | --- | 0     | 1,129  | 2 | 0,5687   | 0,01233604 | MSRA    | yes | 170 804  | intron     | 6          | yes |
| rs7725534   | MRPL22   | t | c | 95,5 | -4,68  | 2,87E-06 | --- | 0     | 0,802  | 2 | 0,6698   | 0,01259078 | -       | -   | 403 490  | intergenic |            |     |
| rs10509573  | IFIT2    | t | c | 95,5 | -4,674 | 2,96E-06 | --- | 0     | 1,034  | 2 | 0,5963   | 0,01284854 | -       | -   | 127 516  | downstream | 6          |     |
| rs4383259   | ZNF415   | a | g | 95,5 | -4,667 | 3,06E-06 | --- | -22,1 | 3,275  | 2 | 0,1945   | 0,01323687 | ZNF347  | -   | 50 206   | intron     | 5          |     |
| rs140929099 | COL4A2   | t | c | 95,5 | 4,66   | 3,17E-06 | +++ | -33   | 3,007  | 2 | 0,2224   | 0,01364047 | COL4A1  | -   | -54 157  | intron     |            |     |
| rs3903399   | RBBP5    | t | c | 95,5 | 4,657  | 3,20E-06 | +++ | 64    | 11,101 | 2 | 0,003886 | 0,01376838 | CNTN2   | yes | -13 727  | intron     | 5          |     |
| rs79079466  | UNC5B    | t | c | 95,5 | -4,656 | 3,23E-06 | --- | 0     | 1,909  | 2 | 0,385    | 0,01384725 | CDH23   | -   | 423 042  | intron     | 4          |     |
| rs79028889  | CNGA1    | a | g | 95,5 | 4,65   | 3,32E-06 | +++ | 0     | 0,282  | 2 | 0,8684   | 0,01408365 | CORIN   | yes | -319 732 | intron     | 6          |     |
| rs12978924  | C19orf57 | t | c | 95,5 | 4,645  | 3,41E-06 | +++ | 0     | 1,794  | 2 | 0,4077   | 0,01436931 | CACNA1A | yes | -454 970 | intron     |            |     |
| rs12206195  | SMPDL3A  | a | c | 95,5 | -4,641 | 3,47E-06 | --- | 0     | 1,75   | 2 | 0,4169   | 0,01452832 | -       | -   | 73 794   | intergenic | 6          |     |
| rs10194503  | DHX57    | c | g | 95,5 | -4,632 | 3,63E-06 | --- | 0     | 0,203  | 2 | 0,9034   | 0,01495591 | GALM    | -   | -104 393 | intron     | 6          |     |
| rs79294885  | NOP10    | a | c | 95,5 | -4,628 | 3,69E-06 | --- | -33,8 | 2,989  | 2 | 0,2244   | 0,01518109 | SLC12A6 | yes | -4 046   | intron     | 4          |     |
| rs36094466  | FOXI1    | a | g | 95,5 | 4,628  | 3,70E-06 | +++ | 0     | 0,67   | 2 | 0,7154   | 0,01521513 | -       | -   | 37 769   | intergenic |            |     |
| rs2216704   | PPWD1    | a | g | 95,5 | 4,623  | 3,79E-06 | +++ | 0     | 0,139  | 2 | 0,9329   | 0,01543906 | -       | -   | -921 047 | intergenic | 6          | yes |
| rs78291594  | PRPSAP2  | a | g | 95,5 | 4,62   | 3,85E-06 | +++ | 0     | 0,428  | 2 | 0,8075   | 0,01562557 | FAM18B1 | -   | -69 161  | intron     | 5          |     |
| rs10751259  | UVRAG    | t | c | 95,5 | 4,619  | 3,86E-06 | +++ | 0,2   | 4,006  | 2 | 0,1349   | 0,01568339 | LRRC32  | yes | 730 661  | intron     | 5          |     |

SUPPLEMENTARY DATA

|             |          |   |   |      |        |          |     |       |        |   |          |            |     |                  |     |            |            |        |
|-------------|----------|---|---|------|--------|----------|-----|-------|--------|---|----------|------------|-----|------------------|-----|------------|------------|--------|
| rs114026170 | PPP2R2D  | c | g | 95,5 | 4,616  | 3,92E-06 | +++ | 66,6  | 11,968 | 2 | 0,002519 | 0,01585021 |     | PPP2R2D          | yes | 18 892     | intron     | 5      |
| rs62179167  | AGPS     | t | c | 95,5 | -4,616 | 3,92E-06 | --- | -80,8 | 2,213  | 2 | 0,3307   | 0,01585117 |     | OSBPL6           | -   | 902 043    | intron     | 6      |
| rs7534670   | USP1     | a | g | 95,5 | -4,613 | 3,97E-06 | --- | 0     | 0,969  | 2 | 0,616    | 0,01602956 |     | ALG6             | yes | 963 636    | intron     | 6      |
| rs12653735  | COMMD10  | a | c | 95,5 | -4,605 | 4,13E-06 | --- | 0     | 0,648  | 2 | 0,7234   | 0,01646018 |     | COMMD10          | yes | 301 808    | intron     | 5      |
| rs8062453   | DEXI     | t | g | 95,5 | -4,603 | 4,16E-06 | --- | 0     | 0,247  | 2 | 0,8839   | 0,01650584 | yes | LITAF            | yes | 651 635    | intron     |        |
| rs4740353   | C9orf78  | t | c | 95,5 | -4,602 | 4,18E-06 | --- | -7,6  | 3,718  | 2 | 0,1558   | 0,01650584 |     | HMCN2            | -   | 658 805    | intron     | 5      |
| rs62223782  | DYRK1A   | t | c | 95,5 | 4,6    | 4,24E-06 | +++ | -94,1 | 2,061  | 2 | 0,3569   | 0,01655952 |     | HLCS             | yes | -573 641   | intron     |        |
| rs8063558   | ABAT     | t | c | 95,5 | -4,596 | 4,30E-06 | --- | -15,5 | 3,463  | 2 | 0,177    | 0,01676633 |     | -                | -   | -1 012 732 | intergenic | 6      |
| rs1887353   | TPP2     | a | g | 95,5 | -4,594 | 4,34E-06 | --- | -25,4 | 3,19   | 2 | 0,2029   | 0,01687961 |     | -                | -   | -12 082    | intergenic | 5      |
| rs56039808  | NFKBIB   | t | c | 95,5 | 4,592  | 4,39E-06 | +++ | 0     | 1,832  | 2 | 0,4001   | 0,01704252 | yes | SIPA1L3          | yes | -827 407   | intron     | 5      |
| rs184005941 | THAP7    | a | c | 95,5 | -4,592 | 4,39E-06 | --- | 0     | 0,439  | 2 | 0,8031   | 0,0170478  |     | MAPK1            | yes | 774 756    | intron     |        |
| rs1036951   | SLC22A3  | c | g | 95,5 | 4,591  | 4,41E-06 | +++ | 0     | 0,456  | 2 | 0,7963   | 0,01712683 |     | IGF2R            | yes | -309 342   | intron     | yes    |
| rs7334264   | MPHOSPH8 | c | g | 95,5 | 4,591  | 4,42E-06 | +++ | 0     | 1,483  | 2 | 0,4765   | 0,01715148 |     | -                | -   | 641 645    | intergenic |        |
| rs2332313   | COX11    | t | g | 95,5 | -4,588 | 4,48E-06 | --- | 0     | 1,67   | 2 | 0,4339   | 0,01735707 |     | TOM1L1           | -   | -10 433    | intron     | 5      |
| rs2811555   | GLUL     | a | g | 95,5 | -4,587 | 4,49E-06 | --- | -83,6 | 2,178  | 2 | 0,3365   | 0,01738867 |     | NMNAT2           | yes | 958 681    | intron     | 6      |
| rs9955053   | WDR7     | a | t | 95,5 | -4,587 | 4,51E-06 | --- | -21,9 | 3,281  | 2 | 0,1939   | 0,0174325  |     | -                | -   | 382 825    | downstream | 6      |
| rs74646715  | MRS2     | a | g | 95,5 | 4,585  | 4,54E-06 | +++ | -59,5 | 2,507  | 2 | 0,2855   | 0,01755546 |     | MRS2             | yes | 18 587     | intron     | 6      |
| rs2232669   | POLR1D   | t | c | 95,5 | -4,579 | 4,66E-06 | --- | -62   | 2,469  | 2 | 0,291    | 0,01796695 |     | POLR1D           | yes | -420       | intron     | 4      |
| rs12171327  | EXOSC9   | a | g | 95,5 | 4,577  | 4,71E-06 | +++ | 0     | 1,981  | 2 | 0,3715   | 0,01811298 |     | -                | -   | -70 791    | intergenic | 6      |
| rs7851652   | LHX3     | t | c | 95,5 | -4,575 | 4,76E-06 | --- | -85,4 | 2,157  | 2 | 0,34     | 0,01826053 |     | -                | -   | -574 982   | downstream | 6      |
| rs61946623  | FAM48A   | a | g | 95,5 | -4,574 | 4,78E-06 | --- | 9     | 4,397  | 2 | 0,111    | 0,01832717 |     | -                | -   | 530 953    | intergenic | 5      |
| rs9535526   | RNASEH2B | t | c | 95,5 | -4,573 | 4,82E-06 | --- | 0     | 0,784  | 2 | 0,6756   | 0,01843265 |     | RNASEH2B         | yes | 632        | intron     | 1b yes |
| rs4938447   | PHLDB1   | a | c | 95,5 | 4,569  | 4,90E-06 | +++ | 0     | 1,372  | 2 | 0,5037   | 0,01869764 |     | -                | -   | -720 862   | intergenic |        |
| rs78358857  | DLGAP1   | t | c | 95,5 | -4,568 | 4,92E-06 | --- | 0     | 1,612  | 2 | 0,4467   | 0,0187572  |     | DLGAP1           | yes | 571 525    | intron     | 6      |
| rs7782374   | CHN2     | t | c | 95,5 | -4,565 | 5,00E-06 | --- | -6,7  | 3,75   | 2 | 0,1534   | 0,01902723 |     | CHN2             | yes | -26 428    | intron     | 5      |
| rs6069006   | BCAS1    | a | g | 95,5 | 4,564  | 5,03E-06 | +++ | 0     | 0,313  | 2 | 0,8551   | 0,01912073 |     | -                | -   | 900 116    | intergenic | 5      |
| rs4254466   | PPP1CB   | a | g | 95,5 | -4,558 | 5,16E-06 | --- | 50,2  | 8,027  | 2 | 0,01807  | 0,01952426 |     | PPP1CB,<br>SPDYA | yes | 34 436     | intron     |        |
| rs2922932   | DLX5     | a | g | 95,5 | -4,555 | 5,23E-06 | --- | -14,7 | 3,488  | 2 | 0,1748   | 0,01973571 |     | -                | -   | -254 891   | intergenic | 5      |



SUPPLEMENTARY DATA

|                         |          |   |   |      |        |          |     |       |        |   |           |            |                   |     |           |            |    |
|-------------------------|----------|---|---|------|--------|----------|-----|-------|--------|---|-----------|------------|-------------------|-----|-----------|------------|----|
| rs11168700              | C12orf41 | a | c | 95,5 | -4,552 | 5,31E-06 | --- | -21,8 | 3,284  | 2 | 0,1936    | 0,01991291 | CCNT1             | yes | 34 204    | intron     | 2b |
| rs72844739              | CD151    | c | g | 95,5 | -4,548 | 5,41E-06 | --- | 44,8  | 7,24   | 2 | 0,02678   | 0,02026703 | DEAF1             | yes | -175 399  | intron     | 5  |
| 4-7837218               | KIAA0232 | a | g | 95,5 | 4,543  | 5,54E-06 | +++ | 0     | 1,699  | 2 | 0,4275    | 0,02070535 | AFAP1             | -   | 1 052 760 | intron     |    |
| rs2890662               | KLHL5    | a | g | 95,5 | -4,543 | 5,55E-06 | --- | 0     | 1,44   | 2 | 0,4867    | 0,02075025 | KLHL5             | yes | 53 929    | intron     | 6  |
| rs7920643               | LARP4B   | a | t | 95,5 | -4,538 | 5,69E-06 | --- | 0     | 0,749  | 2 | 0,6875    | 0,02114456 | -                 | -   | 999 011   | intergenic | 5  |
| rs36073297              | OPA3     | t | c | 95,5 | 4,538  | 5,69E-06 | +++ | 0     | 1,122  | 2 | 0,5706    | 0,02114822 | MARK4             | yes | -292 775  | intron     | 5  |
| rs143844677             | CDC14B   | t | c | 95,5 | -4,535 | 5,76E-06 | --- | 0     | 1,275  | 2 | 0,5285    | 0,02131638 | -                 | -   | -401 822  | intergenic |    |
| rs71455663              | FUJ13224 | a | t | 95,5 | 4,533  | 5,82E-06 | +++ | -73,5 | 2,306  | 2 | 0,3157    | 0,02148959 | DENND5B           | -   | 82 812    | intron     | 6  |
| rs8003968               | ESRRB    | a | c | 95,5 | -4,532 | 5,85E-06 | --- | 0     | 1,265  | 2 | 0,5313    | 0,02158124 | ESRRB             | yes | -45 606   | intron     | 6  |
| rs6065703               | JPH2     | t | c | 95,5 | -4,527 | 5,99E-06 | --- | -24   | 3,225  | 2 | 0,1994    | 0,02202319 | -                 | -   | -3 388    | downstream | 4  |
| rs9525501               | C13orf15 | c | g | 95,5 | 4,525  | 6,05E-06 | +++ | 0     | 1,059  | 2 | 0,5889    | 0,02221089 | -                 | -   | 25 148    | intergenic |    |
| rs115929263             | KIF1A    | c | g | 95,5 | -4,524 | 6,06E-06 | --- | 0     | 0,2    | 2 | 0,9047    | 0,02221089 | NDUFA10           | yes | -797 962  | intron     | 6  |
| rs74676427              | MRPL42   | a | g | 95,5 | 4,522  | 6,13E-06 | +++ | 0     | 0,968  | 2 | 0,6164    | 0,02243002 | -                 | -   | 625 267   | intergenic | 5  |
| rs58809197              | ELAC2    | a | g | 95,5 | -4,52  | 6,18E-06 | --- | 0     | 1,739  | 2 | 0,4192    | 0,02254977 | ELAC2             | yes | 25 332    | intron     | 6  |
| rs10271869              | GIMAP4   | t | c | 95,5 | 4,517  | 6,26E-06 | +++ | 0     | 1,779  | 2 | 0,4109    | 0,02278997 | -                 | -   | -211 469  | intergenic | 4  |
| rs116939934             | ZNF550   | a | g | 95,5 | -4,514 | 6,37E-06 | --- | -40,3 | 2,851  | 2 | 0,2404    | 0,02313126 | -                 | -   | -263 286  | upstream   | 5  |
| rs581508,<br>rs60228684 | OPN3     | c | g | 95,5 | 4,513  | 6,39E-06 | +++ | -26,8 | 3,154  | 2 | 0,2066    | 0,02320349 | OPN3              | yes | 44 950    | intron     | 4  |
| rs12711940              | RALB     | a | t | 95,5 | 4,509  | 6,51E-06 | +++ | 39,1  | 6,563  | 2 | 0,03757   | 0,02357759 | RALB              | yes | 25 973    | intron     | 6  |
| rs4351362               | FLNC     | c | g | 95,5 | 4,505  | 6,64E-06 | +++ | 30,2  | 5,732  | 2 | 0,05691   | 0,02388425 | -                 | -   | 937 884   | downstream | 6  |
| rs2810715               | MIPEP    | c | g | 95,5 | -4,504 | 6,67E-06 | --- | 62,8  | 10,743 | 2 | 0,004647  | 0,0239468  | -                 | -   | 201 789   | intron     |    |
| rs73164728              | MTMR3    | a | g | 95,5 | -4,504 | 6,68E-06 | --- | 27,1  | 5,489  | 2 | 0,06428   | 0,02398218 | MTMR3,<br>HORMAD2 | yes | 256 412   | intron     | 6  |
| rs1358085               | TMOD3    | a | g | 95,5 | -4,503 | 6,70E-06 | --- | 0     | 0,9    | 2 | 0,6377    | 0,02402141 | -                 | -   | 702 239   | upstream   |    |
| rs10503718              | BIN3     | t | c | 95,5 | -4,503 | 6,71E-06 | --- | 0     | 0,058  | 2 | 0,9712    | 0,0240506  | PEBP4             | -   | 134 650   | intron     | 4  |
| rs246228                | ABCC1    | a | c | 95,5 | -4,502 | 6,72E-06 | ->  | 71,7  | 14,155 | 2 | 0,0008441 | 0,0240572  | ABCC1             | yes | 92 209    | intron     | 2b |
| rs12456603              | OSBPL1A  | c | g | 95,5 | -4,495 | 6,96E-06 | --- | 77,3  | 17,654 | 2 | 0,0001467 | 0,02463214 | OSBPL1A           | yes | 23 409    | intron     | 5  |
| rs9997795               | ANK2     | a | g | 95,5 | 4,49   | 7,14E-06 | +++ | 0     | 0,044  | 2 | 0,978     | 0,02463511 | -                 | -   | -351 220  | intergenic |    |
| rs60208411              | PIK3CD   | t | c | 95,5 | 4,479  | 7,50E-06 | +++ | 0     | 1,605  | 2 | 0,4482    | 0,02507555 | UBE4B             | yes | 434 591   | intron     |    |
| rs5050                  | COG2     | t | g | 95,5 | 4,477  | 7,59E-06 | +++ | -62,9 | 2,455  | 2 | 0,293     | 0,02531486 | AGT               | yes | 71 685    | 5'UTR      | 1a |

SUPPLEMENTARY DATA

|                          |          |   |   |      |        |          |     |       |        |   |          |            |     |                  |     |          |                    |    |     |
|--------------------------|----------|---|---|------|--------|----------|-----|-------|--------|---|----------|------------|-----|------------------|-----|----------|--------------------|----|-----|
| rs76826033               | FHOD3    | a | g | 95,5 | -4,475 | 7,64E-06 | --- | -24   | 3,226  | 2 | 0,1993   | 0,02544942 | yes | FHOD3            | yes | 114 632  | intron             |    |     |
| rs4547172                | PFKM     | a | g | 95,5 | -4,474 | 7,69E-06 | --- | 0     | 1,272  | 2 | 0,5294   | 0,02554614 |     | -                | -   | -161 233 | intergenic         | 5  |     |
| rs2854181                | FTSJ3    | t | c | 95,5 | 4,474  | 7,69E-06 | +++ | 63,5  | 10,974 | 2 | 0,00414  | 0,02554871 |     | -                | -   | 72 495   | downstream         |    |     |
| rs10920310               | TIMM17A  | c | g | 95,5 | 4,473  | 7,71E-06 | +++ | 0     | 0,553  | 2 | 0,7585   | 0,02561107 |     | -                | -   | 73 323   | intergenic         | 5  | yes |
| rs2273630                | KHNYN    | t | c | 95,5 | 4,47   | 7,81E-06 | +++ | -31,1 | 3,05   | 2 | 0,2176   | 0,02574839 |     | CBLN3,<br>KHNYN  | yes | 205      | 5'UTR,<br>upstream | 2b |     |
| rs2239325                | ABCC6    | a | c | 95,5 | -4,469 | 7,85E-06 | --- | -11,4 | 3,589  | 2 | 0,1662   | 0,02579527 |     | ABCC6            | yes | 26 710   | intron             | 6  |     |
| rs4839353                | CSDE1    | t | g | 95,5 | 4,464  | 8,03E-06 | +++ | -0,2  | 3,991  | 2 | 0,136    | 0,02627248 | yes | -                | -   | -658 256 | intergenic         |    |     |
| rs72669230               | MEAF6    | a | g | 95,5 | 4,461  | 8,16E-06 | +++ | 0     | 1,297  | 2 | 0,5227   | 0,02667234 |     | -                | -   | 975 076  | intergenic         |    |     |
| rs66708929               | RPL39L   | a | c | 95,5 | 4,46   | 8,20E-06 | +++ | -72,3 | 2,322  | 2 | 0,3132   | 0,02675358 |     | DGKG             | -   | -977 076 | downstream         | 5  |     |
| rs6982560                | ANXA13   | c | g | 95,5 | -4,458 | 8,27E-06 | --- | -33,1 | 3,004  | 2 | 0,2227   | 0,02687986 |     | -                | -   | 734 981  | intergenic         |    |     |
| rs62310596               | CLOCK    | a | g | 95,5 | 4,456  | 8,35E-06 | +++ | 0     | 1,104  | 2 | 0,5759   | 0,02704948 |     | KIAA1211         | -   | 816 257  | intron             |    |     |
| rs4736320                | LY6D     | a | t | 95,5 | 4,455  | 8,38E-06 | +++ | -6,2  | 3,765  | 2 | 0,1522   | 0,02713658 |     | GML,<br>CYP11B2  | yes | 128 064  | intron             | 5  |     |
| rs10948137               | RANBP9   | t | c | 95,5 | 4,452  | 8,51E-06 | +++ | 0     | 0,263  | 2 | 0,8769   | 0,02737097 |     | -                | -   | -961 440 | intergenic         | 6  |     |
| rs12363722               | UNC93B1  | a | c | 95,5 | 4,444  | 8,84E-06 | +++ | 0     | 0,37   | 2 | 0,8312   | 0,02804576 |     | PPP6R3           | -   | 477 717  | intron             | 5  |     |
| rs5805912,<br>rs62941261 | CLDN10   | a | t | 95,5 | -4,441 | 8,96E-06 | --- | 0     | 0,234  | 2 | 0,8895   | 0,0283433  |     | ABCC4            | yes | -194 420 | intron             | 6  |     |
| rs2690923                | CUX1     | a | g | 95,5 | 4,436  | 9,17E-06 | +++ | 0     | 0,13   | 2 | 0,9371   | 0,02878093 | yes | -                | -   | -24 313  | intergenic         |    |     |
| rs28422906               | SLC25A22 | t | c | 95,5 | -4,436 | 9,17E-06 | --- | 0     | 1,344  | 2 | 0,5106   | 0,02878093 |     | AP2A2            | yes | 205 161  | intron             | 5  |     |
| rs654533                 | CD3E     | t | c | 95,5 | -4,434 | 9,25E-06 | --- | 0     | 0,375  | 2 | 0,8292   | 0,02898132 |     | -                | -   | 412 514  | intergenic         | 5  |     |
| rs12702047               | GPER     | a | g | 95,5 | 4,432  | 9,35E-06 | +++ | 0     | 0,682  | 2 | 0,7109   | 0,02926389 | yes | C7orf50,<br>GPER | yes | 6 278    | 3'UTR, intron      | 4  |     |
| rs10752954               | IVNS1ABP | a | g | 95,5 | -4,425 | 9,64E-06 | --- | 43    | 7,02   | 2 | 0,0299   | 0,02982545 |     | -                | -   | 146 861  | intergenic         | 5  |     |
| rs4781128                | LITAF    | a | g | 95,5 | 4,425  | 9,65E-06 | +++ | -64,5 | 2,431  | 2 | 0,2965   | 0,0298506  |     | LITAF            | yes | 65 994   | intron             | 2b |     |
| rs7616890                | ABHD5    | a | g | 95,5 | -4,421 | 9,82E-06 | --- | 0     | 1,149  | 2 | 0,5629   | 0,02992474 |     | ANO10            | yes | -124 878 | intron             |    |     |
| rs13195767               | CDYL     | t | c | 95,5 | 4,421  | 9,85E-06 | +++ | -6,5  | 3,757  | 2 | 0,1528   | 0,02994204 |     | -                | -   | -374 735 | intergenic         | 5  | yes |
| rs4351859                | OAS1     | a | c | 95,5 | 4,419  | 9,94E-06 | +++ | -55,5 | 2,572  | 2 | 0,2764   | 0,03019668 |     | -                | -   | 707 146  | intergenic         | 6  |     |
| rs112042189              | OXCT1    | t | c | 95,5 | 4,413  | 1,02E-05 | +++ | 0     | 0,136  | 2 | 0,934    | 0,03075482 |     | -                | -   | 171 231  | upstream           |    |     |
| rs2249888                | FN3KRP   | a | g | 95,5 | 4,412  | 1,03E-05 | +++ | 58,9  | 9,741  | 2 | 0,007668 | 0,03089098 |     | FN3KRP           | yes | 1 157    | intron             | 1f | yes |
| rs677991                 | TULP3    | t | c | 95,5 | -4,404 | 1,06E-05 | --- | 38,3  | 6,488  | 2 | 0,03901  | 0,03178429 |     | TSPAN9           | -   | 358 751  | intron             | 5  |     |
| rs145785014              | FUS      | t | c | 95,5 | 4,404  | 1,06E-05 | +++ | -6,4  | 3,761  | 2 | 0,1525   | 0,03180505 |     | -                | -   | 398 896  | intergenic         |    |     |

SUPPLEMENTARY DATA

|             |          |   |   |      |        |          |     |       |       |   |          |            |            |     |          |            |    |
|-------------|----------|---|---|------|--------|----------|-----|-------|-------|---|----------|------------|------------|-----|----------|------------|----|
| rs10249186  | INSIG1   | a | t | 95,5 | 4,401  | 1,08E-05 | +++ | 0     | 0,825 | 2 | 0,6618   | 0,03215427 | DPP6       | yes | -916 802 | intron     | 6  |
| rs9301945   | ABCC4    | t | c | 95,5 | 4,4    | 1,08E-05 | +++ | 0     | 0,415 | 2 | 0,8126   | 0,03230546 | GPC6       | -   | -796 774 | intron     | 6  |
| rs28372678  | BAIAP3   | a | g | 95,5 | -4,394 | 1,11E-05 | --- | -53,2 | 2,611 | 2 | 0,2711   | 0,03274606 | SPSB3      | yes | 449 010  | upstream   | 2a |
| rs139621578 | KIAA0922 | a | g | 95,5 | 4,391  | 1,13E-05 | +++ | 27,3  | 5,499 | 2 | 0,06395  | 0,03305217 | -          | -   | -478 849 | intergenic |    |
| rs1391102   | ATP2C2   | c | g | 95,5 | -4,389 | 1,14E-05 | --- | -85,9 | 2,151 | 2 | 0,3411   | 0,03328447 | CRISPLD2   | yes | 541 168  | downstream |    |
| rs658065    | FAM8A1   | a | t | 95,5 | -4,384 | 1,17E-05 | --- | -78,6 | 2,239 | 2 | 0,3264   | 0,03391939 | -          | -   | -808 814 | intergenic | 6  |
| rs9907526   | ITGB4    | c | g | 95,5 | 4,381  | 1,18E-05 | +++ | 0     | 0,779 | 2 | 0,6774   | 0,03420253 | PRPSAP1    | yes | 597 662  | intron     |    |
| rs10792434  | MEN1     | a | g | 95,5 | 4,38   | 1,19E-05 | +++ | -27,8 | 3,13  | 2 | 0,2091   | 0,03432872 | AP003774.4 | -   | -352 575 | 3'UTR      |    |
| rs118122922 | POLDIP3  | t | g | 95,5 | -4,378 | 1,20E-05 | --- | -6,9  | 3,741 | 2 | 0,1541   | 0,03445416 | MPPED1     | -   | 921 316  | intron     | 5  |
| rs4461      | TOM1     | a | g | 95,5 | 4,378  | 1,20E-05 | +++ | 0     | 0,289 | 2 | 0,8656   | 0,03453109 | TOM1       | yes | 6        | intron     | 4  |
| rs7474813   | ADO      | t | c | 95,5 | -4,374 | 1,22E-05 | --- | 0     | 0,437 | 2 | 0,8038   | 0,03496645 | ZNF365     | yes | -175 568 | intron     |    |
| rs2300371   | IL10RB   | t | c | 95,5 | -4,373 | 1,23E-05 | -+  | 70    | 13,32 | 2 | 0,001281 | 0,03513308 | IFNAR2     | -   | 11 228   | intron     | 6  |
| rs7521247   | CD244    | a | g | 95,5 | 4,371  | 1,24E-05 | +++ | 0     | 0,425 | 2 | 0,8087   | 0,03530857 | CD84       | yes | -259 389 | intron     | 6  |
| rs882354    | CAMK2A   | a | g | 95,5 | -4,37  | 1,24E-05 | --- | -59,7 | 2,505 | 2 | 0,2858   | 0,03541133 | SLC6A7     | yes | -1 893   | downstream | 5  |
| rs247902    | TAF1C    | t | c | 95,5 | 4,369  | 1,25E-05 | +++ | 47    | 7,543 | 2 | 0,02301  | 0,03550585 | ATP2C2     | yes | 262 145  | intron     | 6  |
| rs12216486  | IGF2R    | a | g | 95,5 | -4,369 | 1,25E-05 | --- | -10,4 | 3,624 | 2 | 0,1633   | 0,0355864  | -          | -   | -60 514  | downstream | 6  |
| rs4695739   | SCRG1    | a | c | 95,5 | 4,368  | 1,25E-05 | +++ | 0     | 1,428 | 2 | 0,4896   | 0,03566205 | -          | -   | 274 873  | intergenic | 6  |
| rs7210280   | EV12A    | c | g | 95,5 | 4,368  | 1,25E-05 | +++ | 56,1  | 9,105 | 2 | 0,01054  | 0,03568076 | SUZ12P     | -   | -564 657 | intron     |    |
| rs13053864  | CRYBB1   | t | c | 95,5 | -4,36  | 1,30E-05 | --- | -59,4 | 2,51  | 2 | 0,2851   | 0,03669693 | -          | -   | 877 102  | intergenic | 5  |
| rs9481169   | LAMA4    | t | g | 95,5 | -4,36  | 1,30E-05 | --- | -82,2 | 2,195 | 2 | 0,3337   | 0,03676676 | -          | -   | -499 271 | upstream   | 5  |
| rs4458132   | PDE4C    | a | t | 95,5 | 4,358  | 1,31E-05 | +++ | 0     | 0,495 | 2 | 0,7806   | 0,03700917 | PDE4C      | yes | 17 590   | intron     | 5  |
| rs431691    | BLM      | a | g | 95,5 | 4,354  | 1,34E-05 | +++ | 0     | 0,829 | 2 | 0,6607   | 0,03759998 | -          | -   | 99 177   | downstream | 5  |
| rs1858790   | KCNQ1DN  | a | t | 95,5 | 4,351  | 1,36E-05 | +++ | 0     | 0,778 | 2 | 0,6776   | 0,03808836 | ZNF195     | yes | 474 308  | intron     | 6  |
| rs2345055   | EIF2AK1  | a | c | 95,5 | -4,348 | 1,37E-05 | --- | 0     | 1,018 | 2 | 0,6011   | 0,03841638 | AIMP2      | yes | -1 259   | intron     | 4  |
| rs35755011  | HOXB2    | t | c | 95,5 | 4,348  | 1,37E-05 | +++ | 0     | 0,104 | 2 | 0,9492   | 0,03843405 | -          | -   | -57 563  | intergenic | 4  |
| rs146608062 | SLC30A1  | a | g | 95,5 | -4,348 | 1,38E-05 | --- | 0     | 1,637 | 2 | 0,4412   | 0,03850772 | -          | -   | -340 285 | intergenic |    |
| rs9318072   | C13orf34 | t | c | 95,5 | 4,34   | 1,43E-05 | +++ | 0     | 1,827 | 2 | 0,401    | 0,03959639 | -          | -   | -309 604 | intergenic |    |
| rs2276419   | HYOU1    | t | c | 95,5 | -4,338 | 1,44E-05 | --- | 0     | 0,763 | 2 | 0,6827   | 0,03973891 | UBE4A      | yes | -684 536 | 5'UTR      | 4  |

SUPPLEMENTARY DATA

|             |         |   |   |      |        |          |     |       |       |   |         |            |                  |         |          |            |            |   |
|-------------|---------|---|---|------|--------|----------|-----|-------|-------|---|---------|------------|------------------|---------|----------|------------|------------|---|
| rs4919639   | PSD     | c | g | 95,5 | 4,336  | 1,45E-05 | +++ | 41,6  | 6,853 | 2 | 0,03251 | 0,04011794 | -                | -       | 54 484   | upstream   | 5          |   |
| rs4863686   | TBC1D9  | c | g | 95,5 | 4,336  | 1,45E-05 | +++ | -4,4  | 3,833 | 2 | 0,1471  | 0,04017954 | MAML3            | yes     | -863 769 | intron     | 5          |   |
| rs62449081  | GGCT    | t | c | 95,5 | -4,32  | 1,56E-05 | --- | 0     | 0,806 | 2 | 0,6684  | 0,04224068 | yes              | FAM188B | -        | 350 034    | intron     | 5 |
| rs4982255   | PSMA6   | a | g | 95,5 | -4,317 | 1,58E-05 | --- | 0     | 1,591 | 2 | 0,4514  | 0,04270324 | -                | -       | 45 196   | intergenic |            |   |
| rs56982547  | SNPH    | a | g | 95,5 | -4,317 | 1,58E-05 | --- | 0     | 0,552 | 2 | 0,7589  | 0,04275174 | RAD21L1,<br>SNPH | yes     | 16 742   | intron     | 5          |   |
| rs1790469   | GRIK4   | a | g | 95,5 | 4,317  | 1,59E-05 | +++ | 31,4  | 5,832 | 2 | 0,05414 | 0,04282169 | -                | -       | -504 575 | intergenic | 5          |   |
| rs75845312  | ANKZF1  | t | c | 95,5 | 4,316  | 1,59E-05 | +++ | 0     | 0,012 | 2 | 0,9939  | 0,04287016 | -                | -       | 815 546  | intergenic |            |   |
| rs35787376  | RPL23A  | c | g | 95,5 | -4,313 | 1,61E-05 | --- | 5,2   | 4,219 | 2 | 0,1213  | 0,04325673 | -                | -       | -721 322 | intergenic |            |   |
| rs4326952   | ELF1    | t | c | 95,5 | -4,311 | 1,62E-05 | --- | -31,5 | 3,043 | 2 | 0,2184  | 0,0434435  | -                | -       | 481 791  | intergenic |            |   |
| rs34302476  | HBQ1    | a | g | 95,5 | 4,31   | 1,63E-05 | +++ | 0     | 1,82  | 2 | 0,4025  | 0,04364955 | -                | -       | 640 329  | intergenic |            |   |
| rs8078610   | EVI2B   | t | c | 95,5 | -4,309 | 1,64E-05 | --- | 0     | 0,226 | 2 | 0,8932  | 0,04385082 | -                | -       | 285 593  | intergenic | 6          |   |
| rs3818508   | CELSR2  | t | c | 95,5 | 4,308  | 1,65E-05 | +++ | -78,1 | 2,246 | 2 | 0,3254  | 0,04399117 | KIAA1324         | -       | -52 167  | intron     | 5          |   |
| rs3796242   | TSC22D2 | a | t | 95,5 | 4,308  | 1,65E-05 | +++ | 0     | 1,805 | 2 | 0,4055  | 0,04401221 | yes              | CLRN1   | -        | 563 652    | synonymous | 5 |
| rs3784330   | CIB2    | t | c | 95,5 | 4,308  | 1,65E-05 | +++ | 23    | 5,195 | 2 | 0,07445 | 0,04401632 | CIB2             | yes     | 23 321   | intron     | 4          |   |
| rs3008011   | RPS6KA2 | t | c | 95,5 | -4,307 | 1,65E-05 | --- | -9,5  | 3,652 | 2 | 0,161   | 0,04406808 | PDE10A           | yes     | -809 093 | intron     | 5          |   |
| rs1044522   | TMEM134 | a | g | 95,5 | -4,302 | 1,69E-05 | --- | 0     | 0,819 | 2 | 0,6641  | 0,04478612 | CTSF             | yes     | -895 986 | synonymous | 4          |   |
| rs11582371  | SH3GLB1 | t | c | 95,5 | 4,302  | 1,69E-05 | +++ | 16,1  | 4,769 | 2 | 0,09213 | 0,04480688 | -                | -       | -180 447 | intergenic |            |   |
| rs339985    | RORA    | a | t | 95,5 | 4,298  | 1,72E-05 | +++ | 0     | 0,478 | 2 | 0,7872  | 0,04545507 | RORA             | yes     | 137 621  | intron     | 6          |   |
| rs217401    | OGDH    | a | c | 95,5 | -4,298 | 1,73E-05 | --- | 3,4   | 4,139 | 2 | 0,1263  | 0,04554332 | -                | -       | -54 843  | intergenic | 6          |   |
| rs35334347  | NIN     | a | g | 95,5 | -4,296 | 1,74E-05 | --- | -90   | 2,105 | 2 | 0,3491  | 0,04576713 | yes              | NIN     | yes      | 31 502     | intron     |   |
| rs11895231  | DGKD    | t | c | 95,5 | -4,295 | 1,74E-05 | --- | 13,2  | 4,609 | 2 | 0,09979 | 0,0458613  | DGKD             | yes     | -2 250   | intron     |            |   |
| rs12731262  | NECAP2  | t | c | 95,5 | 4,294  | 1,76E-05 | +++ | 0     | 1,198 | 2 | 0,5493  | 0,04612456 | -                | -       | -686 224 | upstream   | 6          |   |
| rs77604319  | RPS6KC1 | a | c | 95,5 | -4,292 | 1,77E-05 | --- | 0     | 1,049 | 2 | 0,592   | 0,04648575 | -                | -       | -536 591 | intergenic | 5          |   |
| rs114111458 | TRAF5   | a | g | 95,5 | 4,288  | 1,80E-05 | +++ | -50,6 | 2,655 | 2 | 0,2651  | 0,04710087 | HHAT             | -       | -901 611 | intron     | 5          |   |
| rs2600560   | DYNC111 | a | g | 95,5 | -4,286 | 1,82E-05 | --- | -11,8 | 3,579 | 2 | 0,167   | 0,04754005 | DYNC111          | yes     | 89 946   | intron     |            |   |
| rs12438010  | PDE8A   | t | g | 95,5 | 4,285  | 1,82E-05 | +++ | 0     | 0,528 | 2 | 0,7678  | 0,0475803  | -                | -       | 329 662  | intergenic | 5          |   |
| rs72665339  | EPHB2   | a | g | 95,5 | -4,285 | 1,83E-05 | --- | 0     | 0,297 | 2 | 0,862   | 0,04759446 | -                | -       | -606 410 | intergenic | 3a         |   |
| rs4512352   | MATN2   | a | g | 95,5 | -4,285 | 1,83E-05 | --- | 0     | 1,937 | 2 | 0,3797  | 0,04760861 | MATN2            | yes     | 58 928   | intron     | 6          |   |

## SUPPLEMENTARY DATA

|            |           |   |   |      |        |          |     |       |       |   |         |            |           |         |          |            |        |   |
|------------|-----------|---|---|------|--------|----------|-----|-------|-------|---|---------|------------|-----------|---------|----------|------------|--------|---|
| rs533494   | IL19      | t | c | 95,5 | -4,284 | 1,83E-05 | --- | 0     | 1,524 | 2 | 0,4667  | 0,04776932 | PIGR      | yes     | 107 570  | intron     |        |   |
| rs74444868 | ARFGAP3   | t | c | 95,5 | -4,283 | 1,85E-05 | --- | 0     | 0,527 | 2 | 0,7682  | 0,04798377 | -         | -       | -7 277   | intergenic |        |   |
| rs61921903 | USP15     | t | c | 95,5 | -4,281 | 1,86E-05 | --- | 32,8  | 5,949 | 2 | 0,05108 | 0,04826345 | -         | -       | 194 750  | intergenic |        |   |
| rs13003555 | SP110     | a | g | 95,5 | -4,28  | 1,87E-05 | --- | -67,2 | 2,392 | 2 | 0,3024  | 0,04849208 | SP110     | yes     | -55 795  | intron     | 5      |   |
| rs12584413 | SACS      | t | g | 95,5 | 4,277  | 1,90E-05 | +++ | 53,2  | 8,555 | 2 | 0,01387 | 0,04893561 | SACS      | yes     | 15 074   | intron     |        |   |
| rs11622788 | ADAM20    | t | c | 95,5 | 4,275  | 1,91E-05 | ++  | 53,7  | 8,648 | 2 | 0,01325 | 0,04926932 | -         | -       | 298 423  | intergenic | 6      |   |
| rs62011588 | NR2F2     | a | c | 95,5 | 4,274  | 1,92E-05 | +++ | 0     | 0,121 | 2 | 0,9411  | 0,04928237 | NR2F2-AS1 | -       | -191 252 | intron     |        |   |
| rs13278111 | TNFRSF10D | t | c | 95,5 | 4,273  | 1,93E-05 | +++ | 0     | 1,322 | 2 | 0,5164  | 0,04928237 | -         | -       | -432 912 | intergenic | 5      |   |
| rs12144062 | PHGDH     | t | c | 95,5 | 4,271  | 1,95E-05 | +++ | 0     | 1,341 | 2 | 0,5113  | 0,04954813 | -         | -       | -130 428 | intergenic |        |   |
| rs2949950  | HELZ      | t | c | 95,5 | -4,27  | 1,96E-05 | --- | 0     | 0,463 | 2 | 0,7934  | 0,04969809 | yes       | PITPNC1 | yes      | 386 347    | intron | 6 |

SUPPLEMENTARY DATA

**Supplementary Table 2.** Significant (FDR < 5%, p-value = 1.34E-04) associations identified between gene expression (standardized units) and fasting plasma insulin, HOMA-IR and BMI through meta-analysis.

| Gene      | Phenotype | P-value  | Direction | Het P-value |
|-----------|-----------|----------|-----------|-------------|
| RCAN2     | BMI       | 2,21E-08 | -+-       | 0,015       |
| SH3GLB2   | BMI       | 3,56E-08 | +++       | 0,508       |
| RBBP6     | BMI       | 8,50E-08 | ---       | 0,600       |
| ALDH1A2   | HOMA-IR   | 9,22E-08 | ++        | 0,009       |
| DBNDD1    | HOMA-IR   | 2,11E-07 | ++        | 0,015       |
| DBNDD1    | insulin   | 3,34E-07 | ++        | 0,006       |
| ARHGEF10L | insulin   | 2,41E-06 | +++       | 0,221       |
| PITPNM1   | BMI       | 3,44E-06 | ---       | 0,018       |
| WSB2      | BMI       | 9,29E-06 | -+-       | 0,002       |
| GZMH      | insulin   | 9,89E-06 | +++       | 0,951       |
| BCL7A     | HOMA-IR   | 1,03E-05 | ---       | 0,176       |
| BCL7A     | insulin   | 1,15E-05 | ---       | 0,186       |
| ENPEP     | BMI       | 1,22E-05 | +++       | 0,440       |
| C17orf101 | insulin   | 1,23E-05 | +++       | 0,229       |
| UGT8      | insulin   | 1,45E-05 | ---       | 0,112       |
| FHL2      | BMI       | 1,53E-05 | -++       | 0,010       |
| CA2       | BMI       | 1,55E-05 | +++       | 0,595       |
| MSTN      | BMI       | 1,82E-05 | +++       | 0,088       |
| DHRS7     | insulin   | 1,84E-05 | +++       | 0,762       |
| IMPA2     | insulin   | 2,39E-05 | +++       | 0,063       |
| ARID1A    | BMI       | 2,52E-05 | +++       | 0,560       |
| TRIO      | BMI       | 2,91E-05 | ---       | 0,774       |
| RAF1      | BMI       | 3,11E-05 | +++       | 0,490       |
| SPR       | BMI       | 3,36E-05 | ---       | 0,011       |
| SPOCK1    | HOMA-IR   | 3,52E-05 | ---       | 0,175       |
| TMOD1     | BMI       | 3,92E-05 | +++       | 0,036       |
| SLC30A10  | insulin   | 4,00E-05 | ---       | 0,817       |
| ARHGEF10L | HOMA-IR   | 4,02E-05 | +++       | 0,211       |
| UGT8      | HOMA-IR   | 4,36E-05 | ---       | 0,041       |
| ALDH1A2   | insulin   | 4,85E-05 | ++        | 0,017       |
| C17orf101 | HOMA-IR   | 5,15E-05 | +++       | 0,300       |
| DAK       | insulin   | 5,83E-05 | -++       | 0,000       |
| BCKDHB    | BMI       | 6,16E-05 | ---       | 0,881       |
| EIF4E2    | insulin   | 6,41E-05 | +++       | 0,173       |
| ARHGAP17  | BMI       | 6,51E-05 | +++       | 0,083       |
| ATP6VOC   | HOMA-IR   | 6,66E-05 | -++       | 0,073       |
| GZMH      | HOMA-IR   | 6,82E-05 | +++       | 0,988       |

SUPPLEMENTARY DATA

|          |         |          |     |       |
|----------|---------|----------|-----|-------|
| PDIA4    | BMI     | 7,14E-05 | +++ | 0,797 |
| G3BP2    | insulin | 7,87E-05 | +++ | 0,371 |
| AGXT2L1  | BMI     | 8,42E-05 | --- | 0,372 |
| CASQ1    | insulin | 8,54E-05 | +++ | 0,191 |
| SLC30A10 | HOMA-IR | 9,04E-05 | --- | 0,764 |
| TMED2    | insulin | 9,08E-05 | +++ | 0,077 |
| CD46     | BMI     | 9,93E-05 | +++ | 0,781 |
| RNF111   | HOMA-IR | 1,07E-04 | ++  | 0,024 |
| GAS6     | insulin | 1,20E-04 | --- | 0,367 |
| CTSF     | BMI     | 1,28E-04 | -+- | 0,001 |
| CALML4   | insulin | 1,33E-04 | +++ | 0,403 |
| PFKM     | insulin | 1,34E-04 | +++ | 0,044 |

**Supplementary Table 3.** Significant (FDR < 5%, p-value = 7.14E-05) associations identified between gene expression (standardized units) and fasting plasma insulin adjusted for BMI, HOMA-IR adjusted for BMI and BMI through meta-analysis.

| Gene    | Phenotype    | P-value  | Direction | Het P-value |
|---------|--------------|----------|-----------|-------------|
| RCAN2   | BMI          | 2,21E-08 | --        | 0,015       |
| SH3GLB2 | BMI          | 3,56E-08 | +++       | 0,508       |
| RBBP6   | BMI          | 8,50E-08 | ---       | 0,600       |
| UNG     | insulin(BMI) | 1,08E-06 | +++       | 0,329       |
| CKAP5   | insulin(BMI) | 1,11E-06 | ---       | 0,433       |
| PITPNM1 | BMI          | 3,44E-06 | ---       | 0,018       |
| TBC1D1  | insulin(BMI) | 4,20E-06 | +++       | 0,196       |
| CALML4  | insulin(BMI) | 9,05E-06 | +++       | 0,192       |
| WSB2    | BMI          | 9,29E-06 | -+-       | 0,002       |
| ENPEP   | BMI          | 1,22E-05 | +++       | 0,440       |
| FHL2    | BMI          | 1,53E-05 | ++        | 0,010       |
| CA2     | BMI          | 1,55E-05 | +++       | 0,595       |
| MSTN    | BMI          | 1,82E-05 | +++       | 0,088       |
| ALDH1A2 | HOMA-IR(BMI) | 1,95E-05 | ++        | 0,048       |
| PRRX1   | insulin(BMI) | 2,32E-05 | -+-       | 0,003       |
| ARID1A  | BMI          | 2,52E-05 | +++       | 0,560       |
| TRIO    | BMI          | 2,91E-05 | ---       | 0,774       |
| RAF1    | BMI          | 3,11E-05 | +++       | 0,490       |
| NRXN3   | insulin(BMI) | 3,25E-05 | --        | 0,008       |
| SPR     | BMI          | 3,36E-05 | ---       | 0,011       |
| GAS6    | insulin(BMI) | 3,63E-05 | ---       | 0,724       |
| TMOD1   | BMI          | 3,92E-05 | +++       | 0,036       |
| BCKDHB  | BMI          | 6,16E-05 | ---       | 0,881       |
| ING2    | HOMA-        | 6,28E-05 | ++        | 0,014       |

SUPPLEMENTARY DATA

|          |                  |          |     |       |
|----------|------------------|----------|-----|-------|
|          | IR(BMI)          |          |     |       |
| ARHGAP17 | BMI              | 6,51E-05 | +++ | 0,083 |
| ATP1B1   | HOMA-<br>IR(BMI) | 6,85E-05 | +++ | 0,534 |
| PDIA4    | BMI              | 7,14E-05 | +++ | 0,797 |



SUPPLEMENTARY DATA

**Supplementary Table 4.** Extended analysis in the MM-study of the influence of the PFKM eQTL SNP (rs4547172) on skeletal muscle metabolic phenotypes.

|          | Non-T2D |             |         |     | T2D  |            |         |    | All   |               |         |     |
|----------|---------|-------------|---------|-----|------|------------|---------|----|-------|---------------|---------|-----|
|          | beta    | IQR         | p-value | n   | beta | IQR        | p-value | n  | beta  | IQR           | p-value | n   |
| M-value  |         |             | 0,27    |     | 0,22 | 0.044-0.39 | 0,015   | 71 | 0,15  | 0.029-0.27    | 0,016   | 178 |
| Delta RQ | 0,017   | 0.003-0.031 | 0,016   | 102 |      |            | 0,4     |    | 0,011 | 0.00012-0.022 | 0,048   | 173 |
| Glycogen |         |             | 0,56    |     | 50,1 | 4.6-95.6   | 0,032   | 63 |       |               | 0,21    |     |
| IMTG     | 15,7    | 5.20-26.2   | 0,004   | 103 |      |            | 0,88    |    | 8,69  | 0.26-17.12    | 0,043   | 167 |
| CGOXBW   |         |             | 0,22    |     | 0,25 | 0.022-0.48 | 0,032   | 71 | 0,19  | 0.025-0.36    | 0,025   | 178 |

Respiratory quotient (RQ), intra muscular triglycerides (IMTG), whole body glucose oxidation rate in the insulin stimulated state during clamp divided by body weight (CGOXBW). Delta RQ = RQclamp – RQbasal. All analysis was adjusted for age and BMI (except for M-value and CGOXBW), Delta RQ was in addition adjusted for RQbasal. M-value was square root transformed.

SUPPLEMENTARY DATA

**Supplementary Table 5.** Public microarray gene expression data used.

|                            | All   |       |     | T2D   |       |    | Non-T2D |       |     | T2D vs. Non-T2D         |
|----------------------------|-------|-------|-----|-------|-------|----|---------|-------|-----|-------------------------|
|                            | Mean  | SD    | n   | Mean  | SD    | n  | Mean    | SD    | n   | p-value*                |
| M-value<br>(mg / kg / min) | 4.41  | 2.27  | 178 | 3.35  | 1.88  | 71 | 5.12    | 2.24  | 107 | 1.42 x 10 <sup>-7</sup> |
| Delta RQ<br>(AU)           | 0.071 | 0.049 | 173 | 0.054 | 0.047 | 71 | 0.082   | 0.047 | 102 | 1.73 x 10 <sup>-4</sup> |
| Glycogen<br>(mmol / kg)    | 373   | 101   | 166 | 371   | 117   | 63 | 374     | 90    | 103 | 0.88                    |
| IMTG<br>(mmol / kg)        | 59.3  | 37.8  | 167 | 60.4  | 39.1  | 64 | 58.6    | 37.2  | 103 | 0.76                    |
| CGOXBW<br>(mg / kg / min)  | 1.96  | 0.74  | 178 | 1.75  | 0.65  | 71 | 2.10    | 0.77  | 107 | 1.99 x 10 <sup>-3</sup> |

\*analysed using student-t test, unadjusted. SD = standard deviation

**Supplementary Table 6.** Publicly available expression data sets used

| Study        | N (T2D) | N (NGT) | N (BMI) |
|--------------|---------|---------|---------|
| E-GEOD-18832 | -       | -       | 21      |
| E-GEOD-22435 | -       | -       | 17      |
| E-GEOD-28998 | -       | -       | 14      |
| E-GEOD-5109  | -       | -       | 6       |
| E-GEOD-6798  | -       | -       | 29      |
| E-GEOD-8157  | -       | -       | 13      |
| E-MEXP-2559  | -       | -       | 35      |
| E-GEOD-18732 | 66      | 40      | -       |
| E-GEOD-19420 | 27      | 10      | -       |
| E-GEOD-25462 | 9       | 37      | 50      |
| TOTAL        | 102     | 87      | 185     |

SUPPLEMENTARY DATA

**Supplementary Figure 1.** Overview of methods

|                                                   |                                                                                                                                                                                                                                                                                                                                                                                                                                                                                                                                                                                                                                       |
|---------------------------------------------------|---------------------------------------------------------------------------------------------------------------------------------------------------------------------------------------------------------------------------------------------------------------------------------------------------------------------------------------------------------------------------------------------------------------------------------------------------------------------------------------------------------------------------------------------------------------------------------------------------------------------------------------|
| <b>Data synchronisation</b><br>MM, MEI and MuTHER | <p style="text-align: center;"><b>Genotype data</b></p> <p style="text-align: center;">1000 Genomes imputation (June 2011 release of the 1000 Genomes Phase 1 panel)</p> <p style="text-align: center;"><b>Gene expression</b></p> <p style="text-align: center;">Gene centric approach: 7006 genes common to all 3 studies and mapped to NCBI build 37</p> <p style="text-align: center;"><b>Phenotype Data</b></p> <p style="text-align: center;">Selected phenotypes: HOMA-IR, fasting plasma insulin and BMI (inversed normalised)</p>                                                                                            |
| <b>Analysis steps</b>                             | <p style="text-align: center;">Meta-analysis of <i>cis</i> eQTLs</p> <p style="text-align: center;">Associations of significant eQTL SNPs in GWAS data from MAGIC and DIAGRAM</p> <p style="text-align: center;">Meta-analysis of gene expression - phenotype associations</p> <p style="text-align: center;">Identifying genetic variation influencing clinical phenotypes through gene expression</p> <p style="text-align: center;">Extended phenotype association of <i>PFKM</i> in the Malmo Men study</p> <p style="text-align: center;">Replication of the expression-phenotype associations using publicly available data</p> |

**References**

1. Cingolani P, Platts A, Wang le L, Coon M, Nguyen T, Wang L, Land SJ, Lu X, Ruden DM: A program for annotating and predicting the effects of single nucleotide polymorphisms, SnpEff: SNPs in the genome of *Drosophila melanogaster* strain w1118; iso-2; iso-3. *Fly (Austin)* 2012;6:80-92
2. Lahti L, Elo LL, Aittokallio T, Kaski S: Probabilistic analysis of probe reliability in differential gene expression studies with short oligonucleotide arrays. *IEEE/ACM Trans Comput Biol Bioinform* 2011;8:217-225
3. Dai M, Wang P, Boyd AD, Kostov G, Athey B, Jones EG, Bunney WE, Myers RM, Speed TP, Akil H, Watson SJ, Meng F: Evolving gene/transcript definitions significantly alter the interpretation of GeneChip data. *Nucleic Acids Res* 2005;33:e175
4. Kauffmann A, Gentleman R, Huber W: arrayQualityMetrics--a bioconductor package for quality assessment of microarray data. *Bioinformatics* 2009;25:415-416
5. Morris AP, Voight BF, Teslovich TM, Ferreira T, Segre AV, Steinthorsdottir V, Strawbridge RJ, Khan H, Grallert H, Mahajan A, Prokopenko I, Kang HM, Dina C, Esko T, Fraser RM, Kanoni S, Kumar A, Lagou V, Langenberg C, Luan J, Lindgren CM, Muller-Nurasyid M, Pechlivanis S, Rayner NW, Scott LJ, Wiltshire S, Yengo L, Kinnunen L, Rossin EJ, Raychaudhuri S, Johnson AD, Dimas AS, Loos RJ, Vedantam S, Chen H, Florez JC, Fox C, Liu CT, Rybin D, Couper DJ, Kao WH, Li M, Cornelis MC, Kraft P, Sun Q, van Dam RM, Stringham HM, Chines PS, Fischer K, Fontanillas P, Holmen OL, Hunt SE, Jackson AU, Kong A, Lawrence R, Meyer J, Perry JR, Platou CG, Potter S, Rehnberg E, Robertson N, Sivapalaratnam S, Stancakova A, Stirrups K, Thorleifsson G, Tikkanen E, Wood AR, Almgren P, Atalay M, Benediktsson R, Bonnycastle LL, Burt N, Carey J, Charpentier G, Crenshaw AT, Doney AS, Dorkhan M, Edkins S, Emilsson V, Eury E, Forsen T, Gertow K, Gigante B, Grant GB, Groves CJ, Guiducci C, Herder C, Hreidarsson AB, Hui J, James A, Jonsson A, Rathmann W, Klopp N, Kravic J, Krjutskov K, Langford C, Leander K, Lindholm E, Lobbens S, Mannisto S, Mirza G, Muhleisen TW, Musk B, Parkin M, Rallidis L, Saramies J, Sennblad B, Shah S, Sigurethsson G, Silveira A, Steinbach G, Thorand B, Trakalo J, Veglia F, Wennauer R, Winckler W, Zabaneh D, Campbell H, van Duijn C, Uitterlinden AG, Hofman A, Sijbrands E, Abecasis GR, Owen KR, Zeggini E, Trip MD, Forouhi NG, Syvanen AC, Eriksson JG, Peltonen L, Nothen MM, Balkau B, Palmer CN, Lyssenko V, Tuomi T, Isomaa B, Hunter DJ, Qi L, Shuldiner AR, Roden M, Barroso I, Wilsgaard T, Beilby J, Hovingh K, Price JF, Wilson JF, Rauramaa R, Lakka TA, Lind L, Dedoussis G, Njolstad I, Pedersen NL, Khaw KT, Wareham NJ, Keinanen-Kiukaanniemi SM, Saaristo TE, Korpi-Hyovalti E, Saltevo J, Laakso M, Kuusisto J, Metspalu A, Collins FS, Mohlke KL, Bergman RN, Tuomilehto J, Boehm BO, Gieger C, Hveem K, Cauchi S, Froguel P, Baldassarre D, Tremoli E, Humphries SE, Saleheen D, Danesh J, Ingelsson E, Ripatti S, Salomaa V, Erbel R, Jockel KH, Moebus S, Peters A, Illig T, de Faire U, Hamsten A, Morris AD, Donnelly PJ, Frayling TM, Hattersley AT, Boerwinkle E, Melander O, Kathiresan S, Nilsson PM, Deloukas P, Thorsteinsdottir U, Groop LC, Stefansson K, Hu F, Pankow JS, Dupuis J, Meigs JB, Altshuler D, Boehnke M, McCarthy MI: Large-scale association analysis provides insights into the genetic architecture and pathophysiology of type 2 diabetes. *Nat Genet* 2012;44:981-990
6. Dupuis J, Langenberg C, Prokopenko I, Saxena R, Soranzo N, Jackson AU, Wheeler E, Glazer NL, Bouatia-Naji N, Gloyn AL, Lindgren CM, Magi R, Morris AP, Randall J, Johnson T, Elliott P, Rybin D, Thorleifsson G, Steinthorsdottir V, Henneman P, Grallert H, Dehghan A, Hottenga JJ, Franklin CS, Navarro P, Song K, Goel A, Perry JR, Egan JM, Lajunen T, Grarup N, Sparso T, Doney A, Voight BF, Stringham HM, Li M, Kanoni S, Shrader P, Cavalcanti-Proenca C, Kumari M, Qi L, Timpson NJ, Gieger C, Zabena C, Rocheleau G, Ingelsson E, An P, O'Connell J, Luan J, Elliott A, McCarroll SA, Payne F,

## SUPPLEMENTARY DATA

Roccasecca RM, Pattou F, Sethupathy P, Ardlie K, Ariyurek Y, Balkau B, Barter P, Beilby JP, Ben-Shlomo Y, Benediktsson R, Bennett AJ, Bergmann S, Bochud M, Boerwinkle E, Bonnefond A, Bonnycastle LL, Borch-Johnsen K, Bottcher Y, Brunner E, Bumpstead SJ, Charpentier G, Chen YD, Chines P, Clarke R, Coin LJ, Cooper MN, Cornelis M, Crawford G, Crisponi L, Day IN, de Geus EJ, Delplanque J, Dina C, Erdos MR, Fedson AC, Fischer-Rosinsky A, Forouhi NG, Fox CS, Frants R, Franzosi MG, Galan P, Goodarzi MO, Graessler J, Groves CJ, Grundy S, Gwilliam R, Gyllensten U, Hadjadj S, Hallmans G, Hammond N, Han X, Hartikainen AL, Hassanali N, Hayward C, Heath SC, Hercberg S, Herder C, Hicks AA, Hillman DR, Hingorani AD, Hofman A, Hui J, Hung J, Isomaa B, Johnson PR, Jorgensen T, Jula A, Kaakinen M, Kaprio J, Kesaniemi YA, Kivimaki M, Knight B, Koskinen S, Kovacs P, Kyvik KO, Lathrop GM, Lawlor DA, Le Bacquer O, Lecoecur C, Li Y, Lyssenko V, Mahley R, Mangino M, Manning AK, Martinez-Larrad MT, McAteer JB, McCulloch LJ, McPherson R, Meisinger C, Melzer D, Meyre D, Mitchell BD, Morken MA, Mukherjee S, Naitza S, Narisu N, Neville MJ, Oostra BA, Orru M, Pakyz R, Palmer CN, Paolisso G, Pattaro C, Pearson D, Peden JF, Pedersen NL, Perola M, Pfeiffer AF, Pichler I, Polasek O, Posthuma D, Potter SC, Pouta A, Province MA, Psaty BM, Rathmann W, Rayner NW, Rice K, Ripatti S, Rivadeneira F, Roden M, Rolandsson O, Sandbaek A, Sandhu M, Sanna S, Sayer AA, Scheet P, Scott LJ, Seedorf U, Sharp SJ, Shields B, Sigurethsson G, Sijbrands EJ, Silveira A, Simpson L, Singleton A, Smith NL, Sovio U, Swift A, Syddall H, Syvanen AC, Tanaka T, Thorand B, Tichet J, Tonjes A, Tuomi T, Uitterlinden AG, van Dijk KW, van Hoek M, Varma D, Visvikis-Siest S, Vitart V, Vogelzangs N, Waeber G, Wagner PJ, Walley A, Walters GB, Ward KL, Watkins H, Weedon MN, Wild SH, Willemssen G, Witteman JC, Yarnell JW, Zeggini E, Zelenika D, Zethelius B, Zhai G, Zhao JH, Zillikens MC, Borecki IB, Loos RJ, Meneton P, Magnusson PK, Nathan DM, Williams GH, Hattersley AT, Silander K, Salomaa V, Smith GD, Bornstein SR, Schwarz P, Spranger J, Karpe F, Shuldiner AR, Cooper C, Dedoussis GV, Serrano-Rios M, Morris AD, Lind L, Palmer LJ, Hu FB, Franks PW, Ebrahim S, Marmot M, Kao WH, Pankow JS, Sampson MJ, Kuusisto J, Laakso M, Hansen T, Pedersen O, Pramstaller PP, Wichmann HE, Illig T, Rudan I, Wright AF, Stumvoll M, Campbell H, Wilson JF, Bergman RN, Buchanan TA, Collins FS, Mohlke KL, Tuomilehto J, Valle TT, Altshuler D, Rotter JI, Siscovick DS, Penninx BW, Boomsma DI, Deloukas P, Spector TD, Frayling TM, Ferrucci L, Kong A, Thorsteinsdottir U, Stefansson K, van Duijn CM, Aulchenko YS, Cao A, Scuteri A, Schlessinger D, Uda M, Ruokonen A, Jarvelin MR, Waterworth DM, Vollenweider P, Peltonen L, Mooser V, Abecasis GR, Wareham NJ, Sladek R, Froguel P, Watanabe RM, Meigs JB, Groop L, Boehnke M, McCarthy MI, Florez JC, Barroso I: New genetic loci implicated in fasting glucose homeostasis and their impact on type 2 diabetes risk. *Nat Genet* 2010;42:105-116

7. Scott RA, Lagou V, Welch RP, Wheeler E, Montasser ME, Luan J, Magi R, Strawbridge RJ, Rehnberg E, Gustafsson S, Kanoni S, Rasmussen-Torvik LJ, Yengo L, Lecoecur C, Shungin D, Sanna S, Sidore C, Johnson PC, Jukema JW, Johnson T, Mahajan A, Verweij N, Thorleifsson G, Hottenga JJ, Shah S, Smith AV, Sennblad B, Gieger C, Salo P, Perola M, Timpson NJ, Evans DM, Pourcain BS, Wu Y, Andrews JS, Hui J, Bielak LF, Zhao W, Horikoshi M, Navarro P, Isaacs A, O'Connell JR, Stirrups K, Vitart V, Hayward C, Esko T, Mihailov E, Fraser RM, Fall T, Voight BF, Raychaudhuri S, Chen H, Lindgren CM, Morris AP, Rayner NW, Robertson N, Rybin D, Liu CT, Beckmann JS, Willems SM, Chines PS, Jackson AU, Kang HM, Stringham HM, Song K, Tanaka T, Peden JF, Goel A, Hicks AA, An P, Muller-Nurasyid M, Franco-Cereceda A, Folkersen L, Marullo L, Jansen H, Oldehinkel AJ, Bruinenberg M, Pankow JS, North KE, Forouhi NG, Loos RJ, Edkins S, Varga TV, Hallmans G, Oksa H, Antonella M, Nagaraja R, Trompet S, Ford I, Bakker SJ, Kong A, Kumari M, Gigante B, Herder C, Munroe PB, Caulfield M, Antti J, Mangino M, Small K, Miljkovic I, Liu Y, Atalay M, Kiess W, James AL, Rivadeneira F, Uitterlinden AG, Palmer

## SUPPLEMENTARY DATA

CN, Doney AS, Willemsen G, Smit JH, Campbell S, Polasek O, Bonnycastle LL, Hercberg S, Dimitriou M, Bolton JL, Fowkes GR, Kovacs P, Lindstrom J, Zemunik T, Bandinelli S, Wild SH, Basart HV, Rathmann W, Grallert H, Maerz W, Kleber ME, Boehm BO, Peters A, Pramstaller PP, Province MA, Borecki IB, Hastie ND, Rudan I, Campbell H, Watkins H, Farrall M, Stumvoll M, Ferrucci L, Waterworth DM, Bergman RN, Collins FS, Tuomilehto J, Watanabe RM, de Geus EJ, Penninx BW, Hofman A, Oostra BA, Psaty BM, Vollenweider P, Wilson JF, Wright AF, Hovingh GK, Metspalu A, Uusitupa M, Magnusson PK, Kyvik KO, Kaprio J, Price JF, Dedoussis GV, Deloukas P, Meneton P, Lind L, Boehnke M, Shuldiner AR, van Duijn CM, Morris AD, Toenjes A, Peyser PA, Beilby JP, Korner A, Kuusisto J, Laakso M, Bornstein SR, Schwarz PE, Lakka TA, Rauramaa R, Adair LS, Smith GD, Spector TD, Illig T, de Faire U, Hamsten A, Gudnason V, Kivimaki M, Hingorani A, Keinanen-Kiukaanniemi SM, Saaristo TE, Boomsma DI, Stefansson K, van der Harst P, Dupuis J, Pedersen NL, Sattar N, Harris TB, Cucca F, Ripatti S, Salomaa V, Mohlke KL, Balkau B, Froguel P, Pouta A, Jarvelin MR, Wareham NJ, Bouatia-Naji N, McCarthy MI, Franks PW, Meigs JB, Teslovich TM, Florez JC, Langenberg C, Ingelsson E, Prokopenko I, Barroso I: Large-scale association analyses identify new loci influencing glycemic traits and provide insight into the underlying biological pathways. *Nat Genet* 2012;44:991-1005
